# 1 Robust computational design and evaluation of 2 peptide vaccines for cellular immunity with 3 application to SARS-CoV-2

4 Ge Liu<sup>1,2,+</sup>, Brandon Carter<sup>1,2,+</sup>, Trenton Bricken<sup>4</sup>, Siddhartha Jain<sup>1</sup>, Mathias Viard<sup>5,6</sup>,  
5 Mary Carrington<sup>5,6</sup>, and David K. Gifford<sup>1,2,3,\*</sup>

6 <sup>1</sup>MIT Computer Science and Artificial Intelligence Laboratory, Cambridge, MA, USA

7 <sup>2</sup>MIT Electrical Engineering and Computer Science, Cambridge, MA, USA

8 <sup>3</sup>MIT Biological Engineering, Cambridge, MA, USA

9 <sup>4</sup>Duke University, Durham, North Carolina, USA

10 <sup>5</sup>Basic Science Program, Frederick National Laboratory for Cancer Research, Frederick, MD, USA

11 <sup>6</sup>Ragon Institute of MGH, MIT, and Harvard, Cambridge, MA, USA

12 \*Gifford@mit.edu

13 +these authors contributed equally to this work

14  
15 May 16, 2020

## 16 ABSTRACT

We present a combinatorial machine learning method to evaluate and optimize peptide vaccine formulations, and we find for SARS-CoV-2 that it provides superior predicted display of viral epitopes by MHC class I and MHC class II molecules over populations when compared to other candidate vaccines. Our method is robust to idiosyncratic errors in the prediction of MHC peptide display and considers target population HLA haplotype frequencies during optimization. To minimize clinical development time our methods validate vaccines with multiple peptide presentation algorithms to increase the probability that a vaccine will be effective. We optimize an objective function that is based on the presentation likelihood of a diverse set of vaccine peptides conditioned on a target population HLA haplotype distribution and expected epitope drift. We produce separate peptide formulations for MHC class I loci (HLA-A, HLA-B, and HLA-C) and class II loci (HLA-DP, HLA-DQ, and HLA-DR) to permit signal sequence based cell compartment targeting using nucleic acid based vaccine platforms. Our SARS-CoV-2 MHC class I vaccine formulations provide 93.21% predicted population coverage with at least five vaccine peptide-HLA hits on average in an individual ( $\geq 1$  peptide 99.91%) with all vaccine peptides perfectly conserved across 4,690 geographically sampled SARS-CoV-2 genomes. Our MHC class II vaccine formulations provide 90.17% predicted coverage with at least five vaccine peptide-HLA hits on average in an individual with all peptides having observed mutation probability  $\leq 0.001$ . We evaluate 29 previously published peptide vaccine designs with our evaluation tool with the requirement of having at least five vaccine peptide-HLA hits per individual, and they have a predicted maximum of 58.51% MHC class I coverage and 71.65% MHC class II coverage given haplotype based analysis. We provide an open source implementation of our design methods (OptiVax), vaccine evaluation tool (EvalVax), as well as the data used in our design efforts.

## 18 1 Introduction

19 Peptide vaccines elicit a protective adaptive immune response to either cancer or infectious agent antigens to immunize against  
20 and combat ongoing disease [1, 2]. Their component peptides present undesired *epitopes* as 3D structural protein subunits or  
21 MHC displayed peptides to train the adaptive immune system to mount a response to a threat. T and B cells use their respective  
22 receptors to recognize vaccine presented epitopes to trigger activation and expansion of their response to the displayed epitopes.  
23 The activated and expanded T and B cells can then effectively mount a response against pathogens or tumor cells. Peptide  
24 vaccines are presently in development for cancer [3] and viral diseases including HIV [4], HCV, and Malaria [2, 5]. An HPV  
25 peptide vaccine is currently licensed for humans and encodes the sequence of two viral peptides that induce both CD4+ and  
26 CD8+ T cell responses [6].

27 The precise control of antigenic T cell recognized epitopes afforded by peptide vaccines has been proposed to reduce the  
28 risks posed by conventional vaccine approaches. For example, the conventional vaccine tetravalent dengue vaccine (CYD-TDV)  
29 increases the risk of hospitalization when an individual is infected with dengue for the first time. A study considered patients  
30 from 2 to 16 years of age that had not been infected at the time of vaccination but were infected post vaccination. The increased

31 risk of hospitalization was thought to occur by antibody-dependent enhancement (ADE) by sub-neutralizing responses to the  
32 infecting dengue serotype [7]. A peptide based dengue vaccine has been proposed to induce CD4+ and CD8+ T cell response  
33 to dengue that would avoid ADE [8]. Given the multiple strains of coronavirus in circulation, considerations of ADE, immune  
34 enhancement, and other deleterious effects of vaccination need to be considered [9].

35 Here we focus on eliciting immunity by the adaptive immune system that is mediated by cells (cellular immunity). Cellular  
36 immunity can be induced with peptide vaccines that cause Major Histocompatibility Complex (MHC) molecules to display  
37 undesired epitopes on cell surfaces. Class I MHC molecules typically display peptides from a cell's internal workings, while  
38 class II MHC molecules display peptides from a cell's external environment that are taken up by professional antigen presenting  
39 cells by phagocytosis, and then made available for loading onto MHC class II molecules for cell surface display for T cell  
40 surveillance. CD8+ T cells recognize cells that are displaying non-self peptides on their class I MHC molecules and target  
41 the cells for destruction, while CD4+ T cells recognize non-self peptides on class II MHC molecules on professional antigen  
42 presenting cells and help prime the activation of CD8+ cells and antibody producing B cells. The production of a strong cellular  
43 immunity response to either a tumor or viral infection is important for positive patient outcomes. Cellular immunity is durable,  
44 and thus an important component of lasting immunity to viral infection.

45 There are multiple delivery platforms for peptide vaccines, including the direct injection of peptides in carriers and the  
46 delivery of recombinant nucleic acid that is turned into peptides by a patient's cells. Recombinant nucleic acid delivery of  
47 vaccine formulations as either DNA or RNA has the advantage that it harnesses a patient's own cells to transiently manufacture  
48 vaccine peptides. Recombinant nucleic acid vectors can be quickly adapted to new payloads. DNA or RNA can be delivered to  
49 cells via nanoparticles, non-pathogenic viruses, or other methods. DNA vaccines have the disadvantage that their DNA must  
50 be transported to the nucleus for transcription in mRNA. RNA vaccines can be delivered encapsulated in lipid nanoparticles  
51 that cells endocytose into the cytosol and translate into peptides [8, 10]. Peptides in a vaccine can be prepended with a signal  
52 sequence to stay within a cell's cytosol for class I display, or be prepended with a different sequence to be transported the  
53 outside of a cell for class II display [11, 12]. A single mRNA molecule can be used to express class I and class II peptides with  
54 each class represented by an array of peptides separated by a 2A self-cleaving peptide site [13]. If desired, class II peptides can  
55 be fused to a protein subunit that is designed to elicit B cell responses and expressed in the same single mRNA molecule. In  
56 addition, class II peptides can be linked to Ii-Key peptides to enhance their presentation [14].

57 A challenge for the design of peptide vaccines is the diversity of human MHC alleles that each have specific preferences  
58 for the peptide sequences they will display. The Human Leukocyte Antigen (HLA) locus encodes the class I and class II  
59 MHC genes. We consider three loci that encode for MHC class I molecules (HLA-A, HLA-B, and HLA-C) and three loci that  
60 encode MHC class II molecules (HLA-DR, HLA-DQ, and HLA-DP). An individual's HLA type describes the MHC alleles  
61 they contain at each of these loci. Peptides of length 8-10 residues can bind to MHC class I molecules whereas those of length  
62 13-25 bind to MHC class II molecules [15, 16].

63 To create effective vaccines it is necessary to consider the MHC allelic frequency in the target population, as well as linkage  
64 disequilibrium between MHC genes to discover a set of peptides that is likely to be robustly displayed. Human populations  
65 that originate from different geographies have differing frequencies of MHC alleles, and these populations exhibit linkage  
66 disequilibrium between HLA loci that result in population specific haplotype frequencies. We utilize haplotype frequencies of  
67 three populations in the design and evaluation of our vaccine candidates.

68 Recent advances in machine learning have produced models that can predict the presentation of peptides by hundreds  
69 of allelic variants of both class I and class II MHC molecules [17, 18, 19, 20, 21]. These models are evaluated on their  
70 ability to accurately predict data unobserved during their training on hundreds of MHC alleles. Each method has its strengths  
71 and weaknesses. Given that different models may be more or less accurate for different sequence families and can make  
72 idiosyncratic errors, we use an ensemble of models for vaccine design. We evaluate completed designs using eleven models to  
73 provide a conservative evaluation of vaccine peptide presentation.

74 Previous peptide vaccine design and evaluation methods do not utilize the distribution of MHC haplotypes in a population,  
75 and thus can not accurately assess the coverage provided by a vaccine. These methods include VaxRank [22] that considers  
76 vaccine design for a single individual, and methods that do not take into account rare MHC allelic combinations including  
77 iVax [23], and SARS-CoV-2 specific efforts [24]. The IEDB Population Coverage Tool [25] estimates peptide-MHC binding  
78 coverage and the distribution of peptides displayed for a given population but assumes independence between different loci and  
79 thus does not consider linkage disequilibrium.

80 We consider methods for vaccine design within the following framework and assumptions. A method takes as input: the  
81 target proteome, the target proteome's expected or observed conservation at amino acid resolution, and the target human  
82 population for vaccination, expressed in terms of the frequencies of their HLA haplotypes. A method outputs: a candidate set  
83 of MHC class I and a set of class II vaccine peptides. Target proteomes can be viral or oncogenes. Our methods eliminate  
84 peptides that are expected to be glycosylated, peptides that are expected to drift in sequence and thus cause vaccine escape, and  
85 peptides that are identical to peptides in the human proteome. Vaccine peptides can be drawn from the entire proteome or from

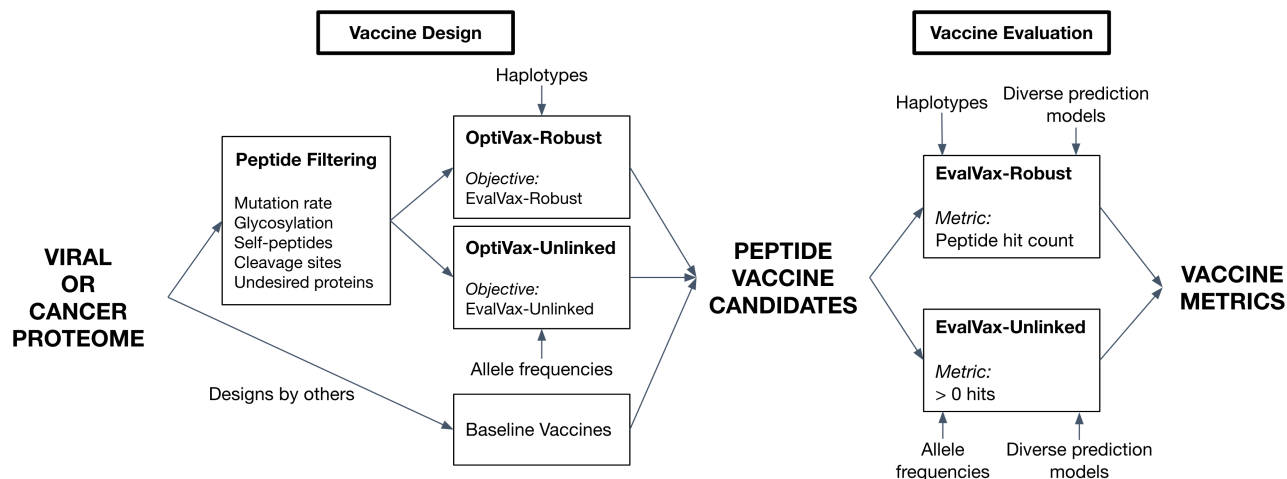

**Figure 1.** The OptiVax and EvalVax machine learning system for combinatorial vaccine optimization and evaluation.

86 specific proteins of interest. An overview of our system is shown in Figure 1.

87 We provide two methods for peptide vaccine evaluation, one that does not consider haplotype frequencies, EvalVax-  
88 Unlinked, and one that considers haplotype frequencies and computes the number of peptides predicted to be associated with  
89 population haplotypes, EvalVax-Robust. We employ these methods as objective functions for peptide vaccine formulation by  
90 combinatorial optimization in OptiVax-Unlinked and OptiVax-Robust. Using conservative metrics of peptide-MHC binding we  
91 find that our optimization methods provide both a higher likelihood of peptide display as well as a larger number of associated  
92 peptides than other published SARS-CoV-2 peptide vaccine designs with less than 150 peptides.

## 93 2 Methods

### 94 2.1 Datasets

95 **A proteome is converted into candidate vaccine peptides** Given a target proteome as input, we identify all potential T cell  
96 epitopes for inclusion in a vaccine. We extract peptides of length 8-10 inclusive for consideration of MHC class I [15] binding  
97 and peptides of length 13-25 inclusive for class II [16] binding by using sliding windows of each size over the entire proteome.  
98 While peptides presented by MHC class I molecules can occasionally be longer than 10 residues [26], we conservatively limit  
99 our search to length 8-10 since MHC class I presented peptides are predominately 8-10 residues in length [15].

100 Using this sliding window approach, we created peptide sets from the SARS-CoV-2 (COVID-19) and SARS-CoV (Human  
101 SARS coronavirus) proteomes. SARS-CoV-2 was processed to discover relevant peptides for a vaccine, and SARS-CoV was  
102 processed to reveal common peptides between the two viruses during evaluation. The SARS-CoV-2 proteome is comprised  
103 of four structural proteins (E, M, N, and S) and at least six additional ORFs encoding nonstructural proteins, including  
104 the SARS-CoV-2 protease [27, 28]. We obtained the SARS-CoV-2 viral proteome from the GISAID [29] sequence entry  
105 Wuhan/IPBCAMS-WH-01/2019, the first documented case. We used Nextstrain [30] to identify open reading frames (ORFs)  
106 and translate the sequence. Our sliding windows on SARS-CoV-2 resulted in 29,403 candidate peptides for MHC class I  
107 and 125,593 candidate peptides for MHC class II. We obtained the SARS-CoV proteome from UniProt [31] under Proteome  
108 ID UP000000354. For SARS-CoV, our procedure creates 29,661 and 126,711 unique peptides for MHC class I and class II,  
109 respectively.

110 **MHC population frequency computation** When we compute the probability of vaccine coverage over a population we use  
111 complementary methods that assume either independence or linkage between allele frequencies in genomically proximal HLA  
112 loci. In EvalVax-Unlinked (Section 2.4.2) we assume independence and use MHC allelic frequencies for 2392 class I alleles and  
113 280 class II alleles from the dbMHC database [32] obtained from the IEDB Population Coverage Tool [25]. In EvalVax-Robust  
114 (Section 2.4.1) we assume linkage and use observed haplotype frequencies of HLA-A, HLA-B, and HLA-C loci for class I  
115 computations, or observed haplotype frequencies of HLA-DP, HLA-DQ, and HLA-DR for class II computations. We observed  
116 a total of 2138 distinct haplotypes for the HLA class I locus that include 230 different HLA-A, HLA-B, and HLA-C MHC  
117 alleles. We observed a total of 1711 distinct haplotypes for the HLA class II locus that include 280 different HLA-DP, HLA-DQ,  
118 and HLA-DR MHC alleles. We have independent haplotype frequency measurements for White, Black, and Asian populations.

119 HLA class I and class II haplotype frequencies were inferred using high resolution typing of individuals from distinct  
120 racial background. We estimated HLA class I haplotypes from HLA-A,-B, and -C genotypes of 2886 individuals of Black  
121 ancestry (46 distinct HLA-A alleles, 70 distinct HLA-B alleles, 40 distinct HLA-C alleles), 2327 individuals of White ancestry  
122 (38 distinct HLA-A alleles, 64 distinct HLA-B alleles, 34 distinct HLA-C alleles) and 1653 individuals of Asian ancestry  
123 (25 distinct HLA-A alleles, 51 distinct HLA-B alleles, 25 distinct HLA-C alleles). HLA class II haplotypes were estimated  
124 based on DR, DQ, DP genotypes of 2474 individuals of Black ancestry (10 distinct HLA-DPA1 alleles, 45 distinct HLA-DPB1  
125 alleles, 14 distinct HLA-DQA1 alleles, 21 distinct HLA-DQB1 alleles, 38 distinct HLA-DRB1 alleles), 1857 individuals  
126 of White ancestry (7 distinct HLA-DPA1 alleles, 29 distinct HLA-DPB1 alleles, 18 distinct HLA-DQA1 alleles, 21 distinct  
127 HLA-DQB1 alleles, 41 distinct HLA-DRB1 alleles) and 1675 individuals of Asian ancestry (7 distinct HLA-DPA1 alleles, 28  
128 distinct HLA-DPB1 alleles, 16 distinct HLA-DQA1 alleles, 16 distinct HLA-DQB1 alleles, 36 distinct HLA-DRB1 alleles).  
129 For each racial background, HLA class I and class II haplotypes were inferred using Hapferret [33] an implementation of the  
130 Expectation-Maximization algorithm [34]. A total of 1200, 779, and 440 class I and 920, 537, and 502 class II haplotype  
131 frequencies were derived in Black, White, and Asian populations, respectively.

## 132 2.2 Robust peptide-MHC binding prediction

133 **Computational models** For a peptide vaccine to be effective, its constituent peptides need to be displayed, and thus a  
134 computational vaccine design must be built upon a solid predictive foundation of what peptides will be displayed by each  
135 MHC allele. Incorrect predictions could lead to failure of a pre-clinical or clinical trial at great human cost. To this end we are  
136 concerned with the precision (true positives / all positives) of our predictions such that we maximize the chance that a peptide  
137 predicted to be displayed will in fact be displayed. We are less concerned with our ability to recall all of the peptides that  
138 will work as long as we have a set of suitable size that will work. We reduce the risk of false positives by employing multiple  
139 computational methods to predict peptide-MHC binding. For design we use an ensemble of methods, and for evaluation we use  
140 all methods separately.

141 For MHC class I design, we use an ensemble that outputs the mean predicted binding affinity of NetMHCpan-4.0 [18]  
142 and MHCflurry 1.6.0 [35, 19]. We find this ensemble increases the precision of binding affinity estimates over the individual  
143 models on available SARS-CoV-2 experimental data (Table S1). For MHC class II design, we use NetMHCIIpan-4.0 [36].  
144 For evaluation, we use our ensemble estimate of binding (MHC class I), as well as use binding predictions from a wide range  
145 of prediction algorithms (MHC class I: NetMHCpan-4.0 [18], NetMHCpan-4.1 [37], MHCflurry 1.6.0 [35], PUFFIN [17];  
146 MHC class II: NetMHCIIpan-3.2 [20], NetMHCIIpan-4.0 [36], PUFFIN [17]) to ensure that all methods agree that we have a  
147 good peptide vaccine. We validate these models on datasets containing experimentally-studied SARS-CoV-2 and SARS-CoV  
148 peptides [38, 39, 40, 41] (see Section S1.2).

149 All models take as input a (MHC, peptide) pair and output predicted peptide-MHC binding affinity (IC<sub>50</sub>) on a nanomolar  
150 scale. For both MHC class I and class II models, we consider peptides to be binders if the predicted MHC binding affinity  
151 is  $\leq 50\text{nM}$  [42]. This provides a conservative threshold to increase the probability of peptide display. Where our methods  
152 require a probability of peptide-MHC binding (as in Equation 5), affinity predictions are capped at 50000nM and transformed  
153 into  $[0, 1]$  using a logistic transformation,  $1 - \log_{50000}(\text{aff})$ , where larger values correspond to greater likelihood of eliciting  
154 an immunogenic response [42, 43, 44]. The  $\leq 50\text{nM}$  binding affinity threshold corresponds to a threshold of  $\geq 0.638$  after  
155 logistic transformation. We explored other criteria to classify peptides as binders and found using predicted binding affinity  
156 with a 50nM threshold to meet these alternative criteria and maximize precision on available SARS-CoV-2 experimental data  
157 (Table S1).

## 158 2.3 Removal of unfavorable peptides

### 159 2.3.1 Removal of highly mutable peptides

160 We eliminate peptides that are observed to mutate above an input threshold rate to improve coverage over all SARS-CoV-2  
161 variants and reduce the chance that the virus will mutate and escape vaccine-induced immunity in the future. When possible,  
162 we select peptides that are observed to be perfectly conserved across all observed SARS-CoV-2 viral genomes. Peptides that  
163 are observed to be perfectly conserved in thousands of examples may be functionally constrained to evolve slowly or not at all.  
164 If functional data are available, they can be used to supplement observed viral genome mutation rates by increasing mutation  
165 rates over functionally non-constrained residues.

166 For SARS-CoV-2, we obtained the most up to date version of the GISAID database [29] (as of 2:02pm EST May 13, 2020, ac-  
167 knowledgements in Section S4) and used Nextstrain [30] (from GitHub commit 639c63f25e0bf30c900f8d3d937de4063d96f791)  
168 to remove genomes with sequencing errors, translate the genome into proteins, and perform multiple sequence alignments  
169 (MSAs). We retrieved 24468 sequences from GISAID, and 19288 remained after Nextstrain quality processing. After quality  
170 processing, Nextstrain randomly sampled 34 genomes from every geographic region and month to produce a representative set  
171 of 5142 genomes for evolutionary analysis. Nextstrain definition of a “region” can vary from a city (e.g., “Shanghai”) to a



172 larger geographical district. Spatial and temporal sampling in Nextstrain is designed to provide a representative sampling of  
173 sequences around the world.

174 The 5142 genomes sampled by Nextstrain were then translated into protein sequences and aligned. We eliminated viral  
175 genome sequences that had a stop codon, a gap, an unknown amino acid (because of an uncalled nucleotide in the codon), or  
176 had a gene that lacked a starting methionine, except for ORF1b which does not begin with a methionine. This left a total of  
177 4690 sequences that were used to compute peptide level mutation probabilities. For each peptide, the probability of mutation  
178 was computed as the number of non-reference peptide sequences observed divided by the total number of peptide sequences  
179 observed.

### 180 **2.3.2 Removal of cleavage regions**

181 SARS-CoV-2 contains a number of post-translation cleavage sites in ORF1a and ORF1b that result in a number of nonstructural  
182 protein products. Cleavage sites were obtained from UniProt [31] under entry P0DTD1. In addition, a furin-like cleavage site  
183 has been identified in the Spike protein [45]. This cleavage occurs before peptides are loaded in the endoplasmic reticulum  
184 for class I or endosomes for class II. Any peptide that spans any of these cleavage sites is removed from consideration. This  
185 removes 3,739 peptides out of the 154,996 we consider across windows 8-10 (class I) and 13-25 (class II) (~2.4%).

### 186 **2.3.3 Removal of glycosylated peptides**

187 We eliminate all peptides that are predicted to have N-linked glycosylation as it inhibits both MHC loading and T cell recognition  
188 of peptides [46]. Glycosylation is a post-translational modification that involves the covalent attachment of carbohydrates to  
189 specific motifs on the surface of the protein. We identified peptides that may be glycosylated with the NetNGlyc N-glycosylation  
190 prediction server [47]. We verified these predictions for the Spike protein using experimental data of Spike N-glycosylation  
191 from Cryo-EM and tandem mass spectrometry [48, 49]. A majority of the potential N-glycosylation sites (16 out of 22) were  
192 identified in both experimental studies, and further supported by homologous regions with glycosylation in SARS-CoV [50].  
193 We found that that for the Spike protein when NetNGlyc predicted a non-zero probability of a site being N-glycosylated it  
194 was experimentally identified as a real or likely N-glycosylation site. Therefore, we eliminated all peptides where NetNGlyc  
195 predicted a non-zero N-glycosylation probability in any residue. This resulted in the elimination of 18,957 of the 154,996  
196 peptides considered (~12%).

### 197 **2.3.4 Self-epitope removal**

198 T cells are selected to ignore peptides derived from the normal human proteome, and thus we remove any self peptides from  
199 consideration for a vaccine. In addition, it is possible that a vaccine might stimulate the adaptive immune system to react  
200 to a self peptide that was presented at an abnormally high level, which could lead to an autoimmune disorder. All peptides  
201 from SARS-CoV-2 were scanned against the entire human proteome downloaded from UniProt [31] under Proteome ID  
202 UP000005640. A total of 48 exact peptide matches (46 8-mers, two 9-mers) were discovered and eliminated from consideration.

### 203 **2.3.5 Removal of undesired proteins**

204 OptiVax will design vaccines using peptides from specific viral or oncogene proteins of interest by removing peptides from  
205 undesired proteins from the candidate pool. Grifoni et al. [51] tested T cell responses from COVID-19 convalescent patients  
206 and found that peptides from the S, M, and N proteins of SARS-CoV-2 produce the dominant CD4+ and CD8+ responses when  
207 compared to other SARS-CoV-2 proteins. We have used OptiVax to produce additional SARS-CoV-2 vaccines comprised of  
208 peptides drawn from only S, M, and N as described in Section 3.2.

## 209 **2.4 EvalVax evaluates peptide vaccine population coverage**

210 We introduce two evaluation methods for estimating the population coverage of a proposed peptide vaccine set. EvalVax-  
211 Robust utilizes HLA haplotype frequencies for MHC class I (HLA-A/B/C) and MHC class II (HLA-DP/DQ/DR) genes, and  
212 evaluates population level likelihood of having larger than a certain number of peptide-HLA binding hits in each individual.  
213 EvalVax-Unlinked considers MHC allele frequencies at each HLA locus independently, and computes the likelihood that at  
214 least one peptide from a vaccine set is displayed at any locus. Both methods take into consideration MHC allele frequency,  
215 allelic zygosity, and for EvalVax-Robust, linkage disequilibrium (LD) among loci. We also take glycosylation and cleavage  
216 sites into consideration when evaluating vaccines by setting binding affinity to zero for peptides with non-zero glycosylation  
217 probability or on cleavage sites.

### 218 **2.4.1 EvalVax-Robust considers linkage disequilibrium of MHC genes**

219 EvalVax-Robust computes the distribution of per individual peptide-HLA binding hits over a given population. It accounts for  
220 the significant linkage disequilibrium (LD) between HLA loci and uses haplotype frequencies for population coverage estimates.  
221 We expect that a vaccine will be more effective if more of its peptides are displayed by an individual's MHC molecules, and

222 thus EvalVax-Robust computes the probability of having at least  $N$  predicted peptide-HLA binding hits for each individual in  
 223 the population.

224 Assuming for each of the HLA-A,B,C loci there are  $M_A, M_B, M_C$  alleles respectively, for a given haploid  $A_i B_j C_k$ , the  
 225 haplotype frequency is defined as  $G(i, j, k)$  and  $\sum_{i=0}^{M_A} \sum_{j=0}^{M_B} \sum_{k=0}^{M_C} G(i, j, k) = 1$ . We assume independence of inherited haplotypes  
 226 and compute the frequency of a diploid genotype as:

$$F_{i_1 j_1 k_1 i_2 j_2 k_2} = F(A_{i_1} B_{j_1} C_{k_1}, A_{i_2} B_{j_2} C_{k_2}) = G(i_1, j_1, k_1) G(i_2, j_2, k_2) \quad (1)$$

227 For each allele  $A$ ,  $e(A)$  denotes the number of peptides predicted to bind to the allele with  $\leq 50$ nM affinity, which we call the  
 228 number of peptide-HLA hits. Then for each possible diploid genotype we compute the total number of peptide-HLA hits of the  
 229 genotype as the sum of  $e(A)$  of the unique alleles in the genotype (there can be 3-6 unique alleles depending on the zygosity of  
 230 each locus):

$$C_{i_1 j_1 k_1 i_2 j_2 k_2} = C(A_{i_1} B_{j_1} C_{k_1}, A_{i_2} B_{j_2} C_{k_2}) = \sum_{\forall A \in \{A_{i_1}, B_{j_1}, C_{k_1}\} \cup \{A_{i_2}, B_{j_2}, C_{k_2}\}} e(A) \quad (2)$$

231 We then compute the frequency of having exactly  $k$  peptide-HLA hits in the population as:

$$P(n = k) = \sum_{i_1=0}^{M_A} \sum_{j_1=0}^{M_B} \sum_{k_1=0}^{M_C} \sum_{i_2=0}^{M_A} \sum_{j_2=0}^{M_B} \sum_{k_2=0}^{M_C} F_{i_1 j_1 k_1 i_2 j_2 k_2} \mathbb{1}\{C_{i_1 j_1 k_1 i_2 j_2 k_2} = k\} \quad (3)$$

232 We define the population coverage objective function for EvalVax-Robust as the probability of having at least  $N$  peptide-HLA  
 233 hits in the population, where the cutoff  $N$  is set to the minimum number of displayed vaccine peptides desired:

$$P(n \geq N) = \sum_{k=N}^{\infty} P(n = k) \quad (4)$$

234 When we evaluate metrics on a world population, we equally weight population coverage estimations over three population  
 235 groups (White, Black, and Asian) as the final objective function. In addition to the probability of having at least  $N$  peptide-HLA  
 236 hits per individual, we also evaluate the expected number of per individual peptide-HLA hits in the population, which provides  
 237 insight on how well the vaccine is displayed on average.

#### 238 **2.4.2 EvalVax-Unlinked computes population coverage by at least one peptide-HLA hit**

239 When haplotype frequencies are not available for a population, we can evaluate a vaccine using MHC allele frequencies that  
 240 assume independence and compute the probability that at least one peptide binds to any of the alleles at any of the loci. To  
 241 encourage a diverse set of peptides to bind to a single MHC allele, we use the predicted binding probability of a peptide to an  
 242 allele instead of using a binary indicator of binding. This permits multiple peptides to contribute to the probability score at each  
 243 allele. Considering  $K$  loci  $\{L_1, \dots, L_K\}$ , for each locus there are  $M_k$  alleles  $A_1, \dots, A_{M_k}$  and the allele frequency is defined as  
 244  $G_k(A_i)$  and  $\sum_{i=1}^{M_k} G_k(A_i) = 1$ . Given a set of  $N$  peptides  $\{P_{n=1:N}\}$ , for each allele (of locus  $L_k$ ) the predicted binding probability  
 245 to peptide  $P_n$  is  $e_k^n(A_i)$ . Assuming no competition between peptides, the probability that allele  $A_i$  ends up having at least one  
 246 peptide bound is:

$$e_k(A_i) = 1 - \prod_{n=1}^N (1 - e_k^n(A_i)) \quad (5)$$

247 We define the diploid frequency of alleles as  $F_k(A_i, A_j) = G_k(A_i) G_k(A_j)$ , and we conservatively assume that a homozygous  
 248 diploid locus does not improve the chance of peptide presentation over a single copy of the locus. Thus, the probability that a  
 249 diploid genotype has at least one peptide bound is defined as:

$$B_k(A_i, A_j) = \begin{cases} 1 - (1 - e_k(A_i))(1 - e_k(A_j)), & \text{if } i \neq j \\ e_k(A_i), & \text{if } i = j \end{cases} \quad (6)$$

250 Therefore, the probability that a person in the given population displays at least one peptide in the set  $\{P_n\}$  at a particular locus  
 251  $L_k$  is calculated by:

$$F_k(P) = \sum_{i=1}^{M_k} \sum_{j=1}^{M_k} F_k(A_i, A_j) B_k(A_i, A_j) \quad (7)$$

252 To combine different loci assuming no linkage disequilibrium, the probability that a person in the given population has at least  
253 one locus that binds to at least one peptide from  $\{P_n\}$  is defined as:

$$P(P) = 1 - \prod_{k=1}^K (1 - F_k(P)) \quad (8)$$

254 which is the evaluation metric for EvalVax-Unlinked.

255 We conservatively only consider peptides with predicted binding affinity  $\leq 50\text{nM}$ . We set values of  $e_k^n(A_i)$  weaker than  
256  $50\text{nM}$  predicted binding affinity to zero. This constraint on peptide binding is in addition to all of the other peptide filters in  
257 Section 2.3. When we evaluate on a world population, we equally weight population coverage estimates over 15 geographic  
258 regions (see Results for list of regions) as the final objective function.

## 259 **2.5 OptiVax selects optimized vaccine peptide sets**

260 We use beam search over a set of candidate peptides to efficiently search for an optimal subset of peptides that maximizes a  
261 desired EvalVax-Unlinked or EvalVal-Robust based objective function. Our beam search procedure is parallelizable across CPU  
262 cores, and we typically use from 40 to 96 cores. We use a beam size of  $k = 10$  for MHC class I and  $k = 5$  for MHC class II.

### 263 **2.5.1 OptiVax-Robust searches for a peptide set with high expected number of per-individual peptide-HLA hits**

264 OptiVax-Robust uses beam search to find a minimal set of peptides that reaches a desired population coverage probability  
265 at a threshold of  $N$  predicted peptide-HLA hits for each individual. We start from an empty set of peptides and  $N = 0$ , and  
266 iteratively expand the solution by one peptide at a time and retain the top  $k$  solutions until the population coverage probability  
267 for the current  $N$  reaches the given population coverage probability threshold for that  $N$ . We then repeat the same process for  
268  $N + 1$ . At the expense of increased computational cost, beam search improves upon greedy optimization by considering  $k$   
269 possible solutions at each step. During each iteration, the population coverage probability threshold at the present  $N$  controls  
270 the robustness of coverage. Increasing the desired population coverage probability increases the difficulty of the optimization  
271 task. The iterative process stops when a desired population coverage at a desired  $N$  is achieved. In early rounds of optimization,  
272 OptiVax uses a high population coverage probability to provide better individual coverage. In subsequent rounds, the target  
273 population coverage probability is reduced on a fixed schedule.

### 274 **2.5.2 OptiVax-Unlinked searches for a peptide set that covers a population**

275 OptiVax-Unlinked uses beam search to find a minimal set of peptides that reaches a desired population coverage probability  
276 that each individual on average displays at least one vaccine peptide. We iteratively expand solutions in the beam by adding one  
277 peptide at a time to reach the population coverage objective, and keep the top  $k$  solutions over all possible expansions in the  
278 beam.

### 279 **2.5.3 OptiVax improves vaccine sequence diversity**

280 OptiVax reduces vaccine sequence redundancy by not selecting peptides with closely related sequences for a vaccine formulation.  
281 This issue arises because sliding a window over a proteome produces overlapping sequences that are very similar in MHC  
282 binding characteristics. When any version of OptiVax selects a peptide during optimization, it eliminates from further  
283 consideration all unselected peptides that are within three (MHC class I) or five (MHC class II) edits on a sequence distance  
284 metric from the selected peptide. The distance metric aligns two peptides without gaps within them and is the sum of the  
285 lengths of their unaligned portions at their ends.

## 286 **3 Results**

### 287 **3.1 Validation of peptide-MHC binding prediction models for OptiVax design**

288 We validate our computational models on datasets containing experimentally-studied SARS-CoV-2 and SARS-CoV peptides [38,  
289 39, 40, 41] (details in Section S1.2). We find classifying peptides as binders by predicted binding affinity  $\leq 50\text{nM}$  maximizes  
290 AUROC and precision in classification of stable binders over alternative predictors and binding criteria (Table S1). Our  
291 ensemble of NetMHCpan-4.0 and MHCflurry further increases AUROC and precision over individual predictors.

### 292 **3.2 OptiVax-Robust optimization results on MHC class I and II**

293 **MHC class I results** We selected an optimized set of peptides from all SARS-CoV-2 proteins using the EvalVax-Robust  
294 objective function. We limited our candidates to peptides with length 8-10 and excluded peptides that have been observed with  
295 any mutation or are predicted to have non-zero probability of glycosylation. For computation of the objective function, we  
296 use the mean predicted IC50 values from our NetMHCpan-4.0 and MHCflurry ensemble to obtain reliable binding affinity  
297 predictions for evaluation and optimization. With OptiVax-Robust optimization, we design a vaccine with 19 peptides that

298 achieves 99.39% EvalVax-Unlinked coverage and 99.91% EvalVax-Robust coverage over three ethnic groups (Asian, Black,  
 299 White) with at least one peptide-HLA hit per individual. This set of peptides also provides 93.21% coverage with at least 5  
 300 peptide-HLA hits and 67.75% coverage with at least 8 peptide-HLA hits (Figure 2, Table 1). The population level distribution  
 301 of the number of peptide-HLA hits in White, Black, and Asian populations is shown in Figure 2, where the expected number of  
 302 peptide-HLA hits is 9.358, 8.515, and 10.206, respectively.

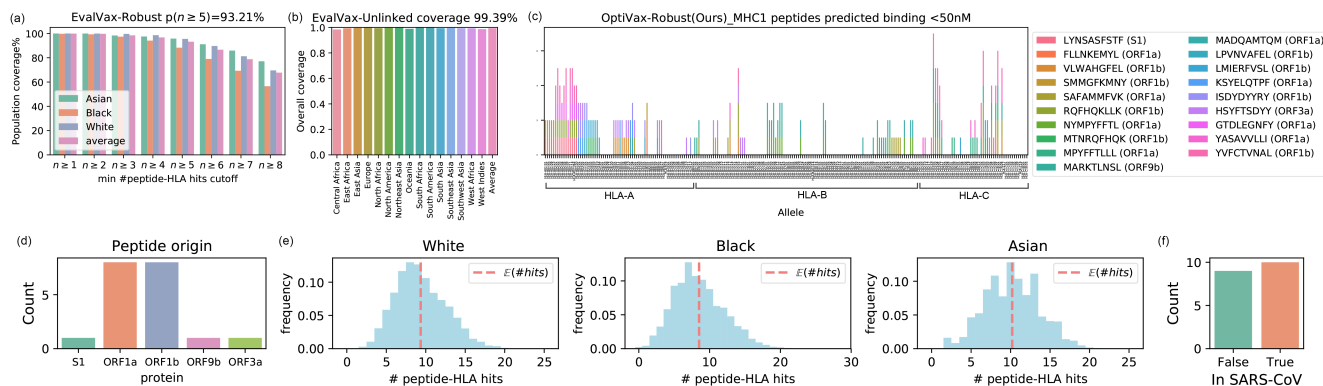

**Figure 2.** OptiVax-Robust selected peptide set for MHC class I. (a) EvalVax-Robust population coverage at different per-individual number of peptide-HLA hit cutoffs for Asian/Black/White populations and average value. (b) EvalVax-Unlinked population coverage on 15 geographic regions and averaged population coverage. (c) Binding of vaccine peptides to 230 HLA-A/B/C alleles. (d) Distribution of peptide origin. (e) Distribution of the number of per-individual peptide-HLA hits in White/Black/Asian populations. (f) Peptide presence in SARS-CoV.

303 **MHC class II results** We limited our candidates to peptides with length 13-25 and excluded peptides that have been observed  
 304 with mutation probability greater than 0.001 or are predicted to have non-zero glycosylation probability. We use the predicted  
 305 binding affinity from NetMHCIIpan-4.0 for optimization and evaluation. With OptiVax-Robust optimization, we design a  
 306 vaccine with 20 peptides that achieves 90.59% EvalVax-Unlinked coverage and 93.21% EvalVax-Robust coverage over three  
 307 ethnic groups (Asian, Black, White) with at least one peptide-HLA hit per individual. This set of peptides also provides 90.17%  
 308 coverage with at least 5 peptide-HLA hits and 45.99% coverage with at least 8 peptide-HLA hits (Figure 3, Table 1). The  
 309 population level distribution of the number of peptide-HLA hits per individual in White, Black, and Asian populations is shown  
 310 in Figure 3, where the expected number of of peptide-HLA hits is 10.703, 9.405, and 7.509, respectively.

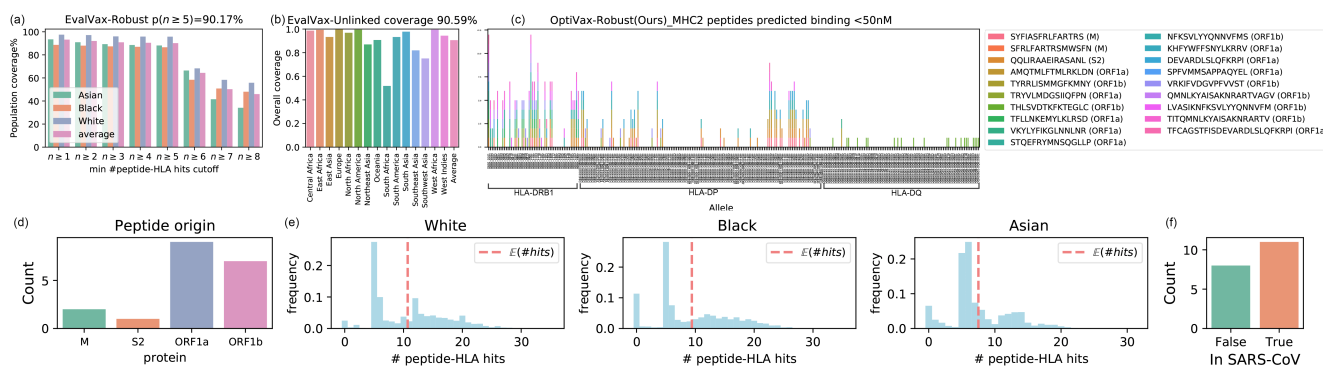

**Figure 3.** OptiVax-Robust selected optimal peptide set for MHC class II. (a) EvalVax-Robust population coverage at different minimum number of peptide-HLA hit cutoffs. (b) EvalVax-Unlinked population coverage. (c) Binding of vaccine peptides to 280 HLA-DRB1/DP/DQ alleles. (d) Distribution of peptide origin. (e) Distribution of the number of per-individual peptide-HLA hits in White/Black/Asian populations. (f) Peptide presence in SARS-CoV.

311 **Designing vaccines with S, M, N proteins only** We also used OptiVax-Robust to design vaccines for MHC class I and class  
 312 II based solely upon peptides from the S, M, and N proteins of SARS-CoV-2 and evaluated vaccine performance. Grifoni et al.  
 313 [51] found that peptides from the S, M, and N structural proteins of SARS-CoV-2 were dominant in producing responses from  
 314 CD4+ and CD8+ cells from convalescent COVID-19 patients. As shown in Table 1, the resulting MHC class I vaccine with 26  
 315 peptides achieves 98.15% coverage over three ethnic groups (Asian, Black, White) with at least one average peptide-HLA hit  
 316 per individual. There were an average of at least five peptide hits in 67.37% of the population, and the expected per-individual



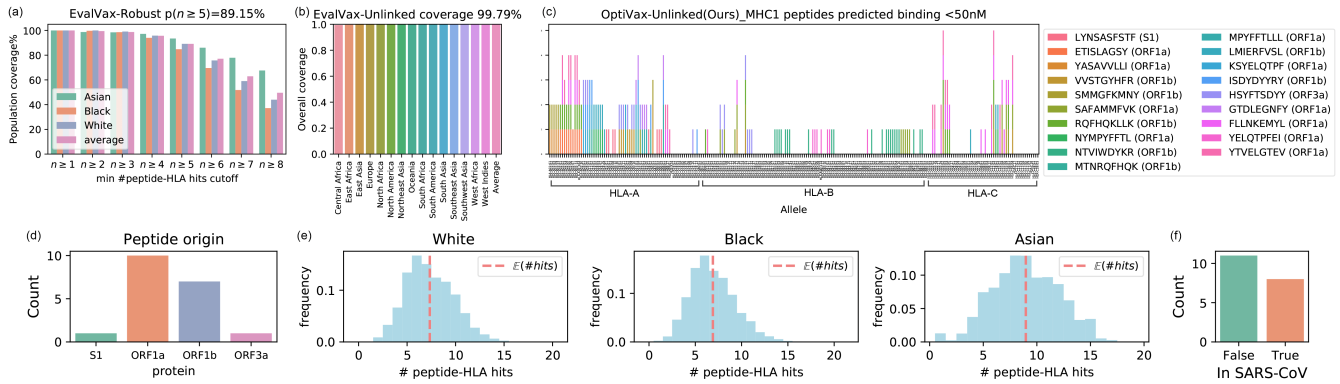

**Figure 4.** OptiVax-Unlinked selected optimal peptide set for MHC class I. (a) EvalVax-Robust population coverage at different per-individual number of peptide-HLA hits cutoffs for Asian/Black/White populations and average value. (b) EvalVax-Unlinked population coverage on 15 geographic regions and averaged population coverage. (c) Binding of vaccine peptides to 230 HLA-A/B/C alleles. (d) Distribution of peptide origin. (e) Distribution of the number of per-individual peptide-HLA hits in White/Black/Asian populations. (f) Peptide presence in SARS-CoV.

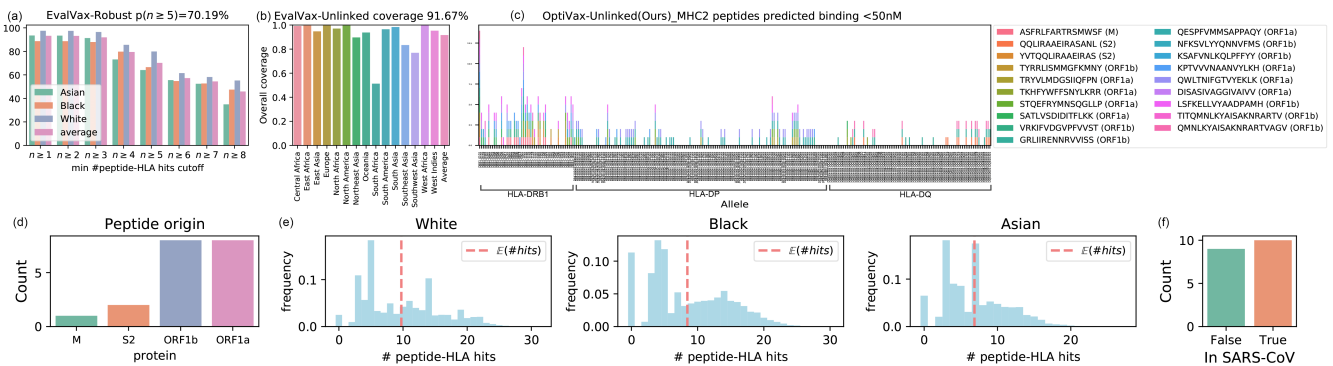

**Figure 5.** OptiVax-Unlinked selected optimal peptide set for MHC class II. (a) EvalVax-Robust population coverage at different minimum number of peptide-HLA hit cutoffs. (b) EvalVax-Unlinked population coverage. (c) Binding of vaccine peptides to 280 HLA-DRB1/DP/DQ alleles. (d) Distribution of peptide origin. (e) Distribution of the number of per-individual peptide-HLA hits in White/Black/Asian populations. (f) Peptide presence in SARS-CoV.

number of hits for White, Black, and Asian populations are 5.313, 5.643, and 6.448, respectively. The OptiVax-Robust MHC class II vaccine with 22 S, M, and N peptides achieves 91.79% coverage with an average of at least one peptide-HLA hit per individual. There were an average of at least five peptide hits in 59.64% of the population, and the expected per-individual number of hits in White, Black, and Asian populations are 7.659, 6.291, and 4.636, respectively. The detailed vaccine designs are in Figure S1. We observed that it is more difficult to optimize vaccines with S, N, and M proteins only. We expect this is because we have fewer candidate peptides to cover all of our haplotype combinations.

### 3.3 OptiVax-Unlinked optimization results on MHC class I and II

**MHC class I results** We limited our candidates to peptides with length 8-10 and zero predicted probability of glycosylation. We also excluded peptides that have been observed with any mutation. We use the mean predicted binding affinity values from our ensemble of NetMHCpan-4.0 and MHCflurry on 2392 MHC class I alleles to obtain reliable binding affinity predictions for evaluation and optimization. With OptiVax-Unlinked optimization, we design a vaccine with 19 peptides that achieves 99.79% EvalVax-Unlinked population coverage (averages over 15 geographic regions). As shown in Figure 4, the 19 vaccine peptides bind to a diverse range of alleles across the HLA-A/B/C loci. Even though less effective than OptiVax-Robust at providing a higher number of expected individual peptide-HLA hits in the population, the OptiVax-Unlinked peptide set still achieves high coverage on EvalVax-Robust metrics (99.99% for  $p(n \geq 1)$ , 89.15% for  $p(n \geq 5)$ , 49.59% for  $p(n \geq 8)$ ). The expected per-individual number of peptide-HLA hits for the design is 7.340, 6.899, and 8.971 for White, Black, and Asian populations, respectively (Table 1).

**MHC class II results** We excluded peptides that have been observed with a mutation probability greater than 0.001 or are predicted to have non-zero probability of being glycosylated. We use the predicted binding affinity from NetMHCIIpan-4.0 for optimization and initial evaluation. With OptiVax-Unlinked, we design a vaccine with 19 peptides that achieves 91.67%

337 EvalVax-Unlinked population coverage (averages over 15 geographic regions). As shown in Figure 5, the 19 vaccine peptides  
 338 bind to a diverse range of alleles across the HLA-DRB/DP/DQ loci. Even though less effective than OptiVax-Robust on  
 339 providing a high predicted number of average peptide-HLA hits in the population, the OptiVax-Unlinked peptide set still  
 340 achieves high coverage on EvalVax-Robust metrics (93.23% for  $p(n \geq 1)$ , 70.19% for  $p(n \geq 5)$ , 45.87% for  $p(n \geq 8)$ ). The  
 341 expected per-individual number of peptide-HLA hits for the design is 9.736, 8.454, and 6.860 for White, Black, and Asian  
 342 populations, respectively (Table 1).

### 343 3.4 EvalVax evaluation of public vaccine designs for SARS-CoV-2

344 We used EvalVax to evaluate peptide vaccines proposed by other publications [52, 24, 53, 54, 55, 56, 57, 58, 59, 60, 61, 62,  
 345 63, 64, 65, 66, 67, 68, 69] on metrics including EvalVax-Unlinked and EvalVax-Robust population coverage at different per-  
 346 individual number of peptide-HLA hits thresholds, expected per-individual number of peptide-HLA hits in White, Black, and  
 347 Asian populations, percentage of peptides that are predicted to be glycosylated, peptides observed to mutate with greater than  
 348 0.001 probability, or peptides that sit on known cleavage sites. We define *vaccine efficiency* as the mean expected per-individual  
 349 number of peptide-HLA hits for a vaccine divided by the number of peptides in the vaccine. This metric represents the mean  
 350 probability of display of each peptide in a vaccine, and normalizes vaccine performance by vaccine peptide count.

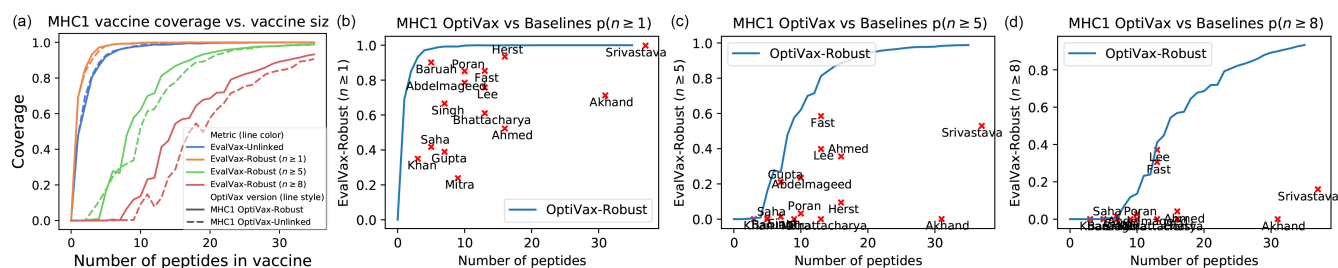

**Figure 6.** EvalVax population coverage evaluation for MHC class I vaccines. (a) EvalVax population coverage for OptiVax-Unlinked and OptiVax-Robust proposed vaccine at different vaccine size (b) EvalVax-Robust population coverage with  $n \geq 1$  peptide-HLA hits per individual, OptiVax-Robust performance is shown by the blue curve and baseline performance is shown by red crosses (labeled by first author's name) (c) EvalVax-Robust population coverage with  $n \geq 5$  peptide-HLA hits. (d) EvalVax-Robust population coverage with  $n \geq 8$  peptide-HLA hits.

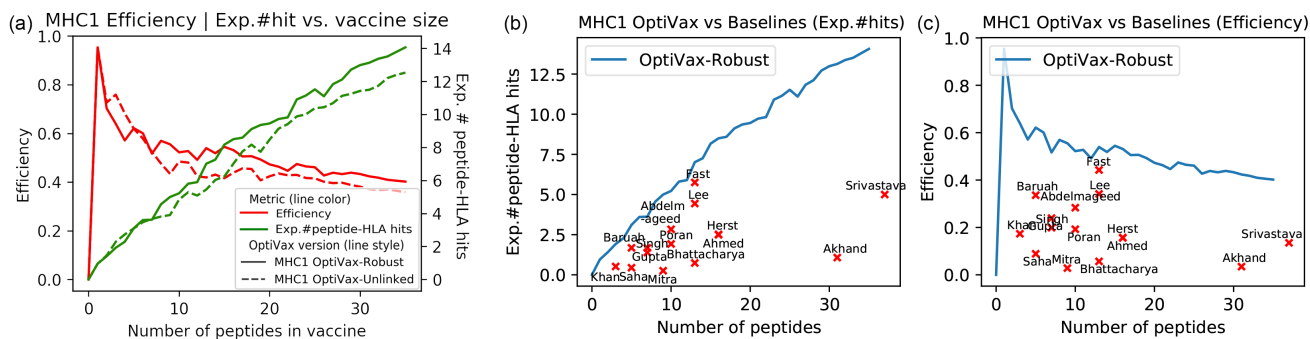

**Figure 7.** Expectation of per individual number of peptide-HLA hits and vaccine efficiency for MHC class I vaccines. (a) Expected number of peptide-HLA hits vs. peptide vaccine size for OptiVax-Robust and OptiVax-Unlinked, and efficiency (hits / vaccine size) at different vaccine size. (b) Comparison between OptiVax-Robust and baselines on expected number of peptide-HLA hits. OptiVax-Robust performance is shown by the blue curve and baseline performance is shown by red crosses (c) Comparison between OptiVax-Robust and baselines on efficiency.

351 Figures 6 to 9 show the comparison between OptiVax-Robust designed MHC class I and class II vaccines at all vaccine  
 352 sizes (top solution in the beam up to the given vaccine size) from 1-35 peptides (blue curves) and baseline vaccines (red crosses)  
 353 proposed by other publications. We observe superior performance of OptiVax-Robust designed vaccines on all evaluation  
 354 metrics at all vaccine sizes for both MHC class I and class II. Most baselines achieve reasonable coverage at  $n \geq 1$  peptide hits.  
 355 However, many fail to show a high probability of higher hit counts, indicating a lack of predicted redundancy if a single peptide  
 356 is not displayed. We also evaluate randomly selected peptide sets of size 19 from predicted binders of MHC class I and II,  
 357 where a binder is defined as a peptide that is predicted to bind with  $\leq 50$ nM to more than 5 of the alleles in the MHC class. We  
 358 found that a random binder set can achieve coverage that outperforms some of the proposed vaccines that we use as baselines.

359 Table 1 summarizes EvalVax results for all baselines with a vaccine peptide count less than 150 peptides. We also included  
 360 evaluation on peptide sets derived from taking all sliding windows with proper size for MHC class I and II from the S protein or  
 361 S1 subunit, and evaluated an average of 500 random designs for MHC class I or class II that are comprised of 19 peptides that  
 362 are predicted to bind either MHC class I and II. We found that the baseline methods all provide less coverage than OptiVax  
 363 derived sets, and some contain peptides predicted to be glycosylated or have a high observed mutation probability (Table 1).  
 364 We also observe some baselines contain peptides that sit on the cleavage sites or overlap with self-peptides. In addition, we  
 365 found that for class II MHC coverage the S protein alone is unable to achieve more than 88% coverage for  $n \geq 0$  and 75.9%  
 366 coverage  $n \geq 5$ .

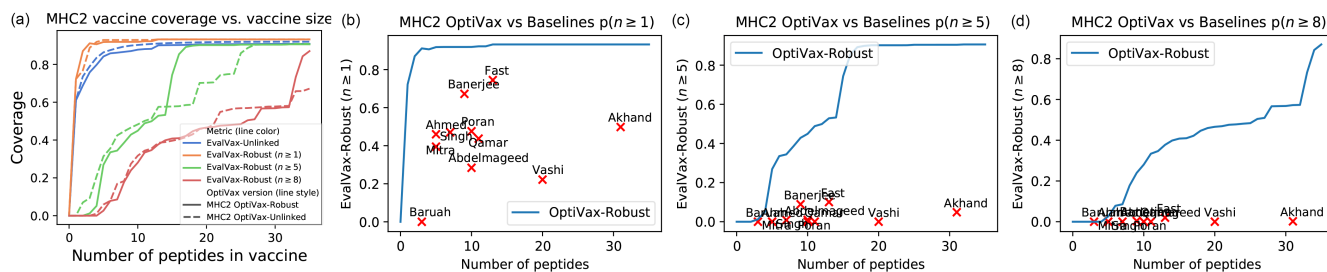

**Figure 8.** EvalVax population coverage evaluation for MHC class II vaccines. (a) EvalVax population coverage for OptiVax-Unlinked and OptiVax-Robust proposed vaccine at different vaccine sizes. (b) EvalVax-Robust population coverage with  $n \geq 1$  peptide-HLA hits per individual, OptiVax-Robust performance is shown by the blue curve and baseline performance is shown by red crosses (labeled by first author's name). (c) EvalVax-Robust population coverage with  $n \geq 5$  peptide-HLA hits. (d) EvalVax-Robust population coverage with  $n \geq 8$  peptide-HLA hits.

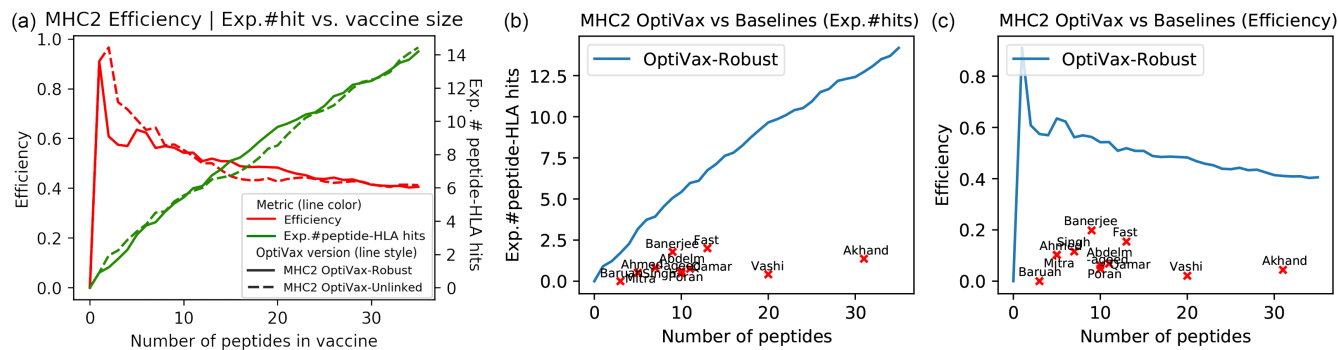

**Figure 9.** Expectation of per individual number of peptide-HLA hits and vaccine efficiency for MHC class II vaccines. (a) Expected number of peptide-HLA hits vs. peptide vaccine size for OptiVax-Robust and OptiVax-Unlinked, and efficiency (hits / vaccine size) at different vaccine size. (b) Comparison between OptiVax-Robust and baselines on expected number of peptide-HLA hits. OptiVax-Robust performance is shown by the blue curve and baseline performance is shown by red crosses. (c) Comparison between OptiVax-Robust and baselines on efficiency.

### 367 3.5 EvalVax results are robust to different binding prediction models

368 We evaluated all Table 1 vaccine designs using eleven independent peptide-MHC binding prediction methods to ensure  
 369 that the performance observed in Table 1 is not an artifact. For MHC class I prediction we validated using seven methods:  
 370 NetMHCpan-4.0; NetMHCpan-4.1; MHCflurry 1.6.0; PUFFIN; the mean of NetMHCpan-4.0 and MHCflurry 1.6.0 with a  
 371 50nM cutoff on predicted affinity; and NetMHCpan-4.0 and NetMHCpan-4.1 with a 99.5% cutoff on EL ranking. For MHC  
 372 class II peptide-MHC binding prediction we validated using four different methods: NetMHCIIpan-3.2 and NetMHCIIpan-4.0,  
 373 each with either a 50nM cutoff on predicted affinity or a 98% cutoff on EL ranking. The result of all eleven EvalVax evaluation  
 374 metrics for all Table 1 designs are shown in Supplement Section S3. We find that all of the eleven methods we use for evaluation  
 375 show that Table 1 is a conservative estimate of vaccine performance.

## 376 4 Discussion

377 The computational design of peptide vaccines for eliciting cellular immunity is built upon the imperfect science of predicting  
 378 peptide presentation by MHC molecules. Peptide vaccine designs also need to ensure that individuals with rare MHC alleles  
 379 display vaccine peptides to ensure a high rate of vaccine efficacy over the entire population.

380 To mitigate computational model uncertainty we have taken a very conservative view of peptide presentation, emphasizing  
381 precision over recall. To provide coverage for individuals with rare HLA types we use haplotype frequencies that include these  
382 types in our evaluations. We provide an evaluation tool, EvalVax, to permit the flexible analysis of vaccine proposals on key  
383 metrics, including population coverage and the expected number of peptides displayed. Not surprisingly, our OptiVax vaccine  
384 designs that are optimized with respect to EvalVax objective functions do well on the same metrics. We also find that OptiVax  
385 designs do well when evaluated on eleven computational models of peptide MHC binding, providing encouragement that their  
386 component peptides will be displayed.

387 EvalVax can be used for vaccine designs that are focused on the expression of viral proteins or their subunits to evaluate  
388 the level of viral peptide MHC presentation that is predicted to result. We note for SARS-CoV-2 in Table 1 that S protein and  
389 the S1 subunit both are limited in their predicted ability to provide robust population coverage for MHC class II display of  
390 more than five viral epitopes. This suggests that vaccines that only employ the S protein or its subunits may require additional  
391 peptide components for reliable CD4+ T cell activation across the entire population.

392 At present the World Health Organization lists 79 COVID-19 vaccine candidates in clinical or preclinical evaluation [70],  
393 and the precise designs of most of these vaccines are not public. We encourage the early publication of vaccine designs to  
394 enable collaboration and rapid progress towards safe and effective vaccines for COVID-19.

395 All of our software and data are freely available as open source to allow others to use and extend our methods.

### 396 **Acknowledgements**

397 Michael Birnbaum, Brooke Huisman, and Jonathan Krog provided helpful discussions. Viral sequences are from GISAID (see  
398 acknowledgement spreadsheet). This work was supported in part by Schmidt Futures and NIH grant R01CA218094 to  
399 D.K.G.

400 This project has been funded in part with federal funds from the Frederick National Laboratory for Cancer Research, under  
401 Contract No. HHSN261200800001E. The content of this publication does not necessarily reflect the views or policies of the  
402 Department of Health and Human Services, nor does mention of trade names, commercial products, or organizations imply  
403 endorsement by the U.S. Government. This Research was supported in part by the Intramural Research Program of the NIH,  
404 Frederick National Lab, Center for Cancer Research. The views expressed in this article do not necessarily reflect the official  
405 policy or position of the National Institutes of Health, the Department of the Navy, the Department of Defense, or any other  
406 agency of the US government.

### 407 **Data and Software Availability**

408 Our data and code are available at: <https://github.com/gifford-lab/optivax>



| Study                                          | Vaccine size | EvalVax-<br>Unlinked | EvalVax-<br>Robust<br>$p(n \geq 1)$ | EvalVax-<br>Robust<br>$p(n \geq 5)$ | EvalVax-<br>Robust<br>$p(n \geq 8)$ | Efficiency                                    |         |         |         | Peptides<br>Glyco-<br>sylated | Peptides<br>Muta-<br>tion Rate<br>> 0.001 | On<br>cleavage<br>site | Protein origins                                              | In<br>SARS-<br>CoV |
|------------------------------------------------|--------------|----------------------|-------------------------------------|-------------------------------------|-------------------------------------|-----------------------------------------------|---------|---------|---------|-------------------------------|-------------------------------------------|------------------------|--------------------------------------------------------------|--------------------|
|                                                |              |                      |                                     |                                     |                                     | peptide-<br>HLA<br>hits /<br>vaccine<br>size) | Exp. #  | Exp. #  | Exp. #  |                               |                                           |                        |                                                              |                    |
| <b>MHC Class I Peptide Vaccine Evaluation</b>  |              |                      |                                     |                                     |                                     |                                               |         |         |         |                               |                                           |                        |                                                              |                    |
| S-protein                                      | 3795         | 99.96%               | 100.00%                             | 99.17%                              | 98.29%                              | 0.91%                                         | 30.845  | 32.139  | 41.134  | 15.57%                        | 29.99%                                    | 0.63%                  | S1, S2                                                       | 29.30%             |
| OptiVax-Unlinked (Ours)                        | 19           | 99.79%               | 99.99%                              | 89.15%                              | 49.59%                              | 40.72%                                        | 7.340   | 6.899   | 8.971   | 0.00%                         | 0.00%                                     | 0.00%                  | ORF1a/b, ORF3a, S1                                           | 42.11%             |
| S1-subunit                                     | 2055         | 99.88%               | 99.99%                              | 98.73%                              | 93.52%                              | 0.74%                                         | 14.990  | 15.186  | 15.585  | 17.08%                        | 30.02%                                    | 1.17%                  | S1                                                           | 10.17%             |
| OptiVax-Robust (Ours)                          | 19           | 99.39%               | 99.91%                              | 93.21%                              | 67.75%                              | 49.26%                                        | 9.358   | 8.515   | 10.206  | 0.00%                         | 0.00%                                     | 0.00%                  | ORF1a/b, ORF3a, S1, ORF9b                                    | 52.63%             |
| OptiVax-Robust (Ours)_len15                    | 15           | 99.07%               | 99.89%                              | 86.69%                              | 54.36%                              | 54.47%                                        | 8.175   | 7.196   | 9.140   | 0.00%                         | 0.00%                                     | 0.00%                  | ORF1a/b, S1, ORF9b                                           | 53.33%             |
| Srivastava-Mangalayatan [58]                   | 37           | 95.86%               | 99.75%                              | 52.94%                              | 16.00%                              | 13.51%                                        | 5.365   | 4.986   | 4.645   | 8.11%                         | 37.84%                                    | 0.00%                  | ORF1a/b, ORF3a, N, E, S1,<br>ORF10, ORF7ab, ORF8, M,<br>ORF6 | 45.95%             |
| OptiVax-Robust (Ours)_SMN only                 | 26           | 97.49%               | 98.15%                              | 67.37%                              | 26.24%                              | 22.31%                                        | 5.313   | 5.643   | 6.448   | 0.00%                         | 0.00%                                     | 0.00%                  | N, S2, S1, M                                                 | 57.69%             |
| Herst-FlowPharma [59]                          | 52           | 90.89%               | 95.82%                              | 56.52%                              | 19.99%                              | 9.88%                                         | 5.204   | 4.437   | 5.767   | 7.69%                         | 34.62%                                    | 0.00%                  | N                                                            | 55.77%             |
| Herst-FlowPharma-top16 [59]                    | 16           | 80.41%               | 93.46%                              | 9.47%                               | 0.03%                               | 15.73%                                        | 2.747   | 2.602   | 2.203   | 12.50%                        | 12.50%                                    | 0.00%                  | N                                                            | 68.75%             |
| Random subset of binders                       | 19           | 81.04%               | 90.33%                              | 25.02%                              | 4.58%                               | 16.74%                                        | 3.012   | 2.834   | 3.695   | 0.00%                         | 29.89%                                    | 0.00%                  | N/A                                                          | 40.37%             |
| Baruah-Gauhait [55]                            | 5            | 71.91%               | 90.10%                              | 0.55%                               | 0.00%                               | 33.60%                                        | 1.928   | 1.441   | 1.672   | 0.00%                         | 40.00%                                    | 0.00%                  | S1, S2                                                       | 40.00%             |
| Fast-Stanford [24]                             | 13           | 78.66%               | 85.29%                              | 58.51%                              | 30.56%                              | 44.25%                                        | 5.587   | 4.977   | 6.693   | 7.69%                         | 30.77%                                    | 0.00%                  | N, S1, S2, ORF1a, E, M                                       | 23.08%             |
| Poran-NEON [53]                                | 10           | 69.12%               | 85.13%                              | 3.21%                               | 0.01%                               | 19.23%                                        | 1.683   | 1.721   | 2.366   | 0.00%                         | 30.00%                                    | 0.00%                  | ORF3a, ORF1a/b, ORF8, S1                                     | 20.00%             |
| Vashi-Guwahati [60]                            | 51           | 68.63%               | 80.80%                              | 1.52%                               | 0.00%                               | 3.12%                                         | 1.898   | 1.702   | 1.175   | 12.77%                        | 46.81%                                    | 6.38%                  | S1, S2                                                       | 6.38%              |
| Abdelmageed-Khartoum [56]                      | 10           | 66.91%               | 78.49%                              | 23.49%                              | 2.72%                               | 28.34%                                        | 2.933   | 2.501   | 3.069   | 10.00%                        | 10.00%                                    | 0.00%                  | E                                                            | 80.00%             |
| Lee-Oxford [52]                                | 13           | 64.96%               | 75.75%                              | 39.82%                              | 37.09%                              | 34.15%                                        | 4.771   | 3.685   | 4.862   | 0.00%                         | 7.69%                                     | 0.00%                  | ORF1a/b, S2, E, N                                            | 53.85%             |
| Akhand-Sylhet [61]                             | 31           | 49.46%               | 71.24%                              | 0.08%                               | 0.00%                               | 3.47%                                         | 1.091   | 1.109   | 1.025   | 3.23%                         | 35.48%                                    | 0.00%                  | E, M, N, S1                                                  | 41.94%             |
| Singh-Kolkata [69]                             | 7            | 53.91%               | 66.59%                              | 1.38%                               | 0.00%                               | 19.87%                                        | 1.341   | 1.298   | 1.534   | 0.00%                         | 28.57%                                    | 0.00%                  | N, S2, E, M, S1                                              | 71.43%             |
| Bhattacharya-Hallym [54]                       | 13           | 44.56%               | 61.09%                              | 0.00%                               | 0.00%                               | 5.67%                                         | 0.792   | 0.688   | 0.731   | 23.08%                        | 46.15%                                    | 7.69%                  | S2, S1                                                       | 23.08%             |
| Ahmed-HKUST [57]                               | 16           | 45.25%               | 52.30%                              | 35.61%                              | 4.15%                               | 15.57%                                        | 2.558   | 2.182   | 2.735   | 12.50%                        | 25.00%                                    | 0.00%                  | S2, N                                                        | 100.00%            |
| Saha-Tripura [67]                              | 5            | 29.90%               | 41.77%                              | 0.00%                               | 0.00%                               | 8.86%                                         | 0.563   | 0.358   | 0.408   | 0.00%                         | 20.00%                                    | 0.00%                  | S1                                                           | 20.00%             |
| Gupta-Jaipur [66]                              | 7            | 30.23%               | 38.91%                              | 21.08%                              | 1.41%                               | 23.92%                                        | 1.325   | 0.548   | 3.150   | 0.00%                         | 42.86%                                    | 0.00%                  | S2, S1                                                       | 14.29%             |
| Khan-JMI [63]                                  | 3            | 27.14%               | 34.98%                              | 0.00%                               | 0.00%                               | 17.33%                                        | 0.762   | 0.556   | 0.241   | 0.00%                         | 66.67%                                    | 0.00%                  | S2, S1                                                       | 0.00%              |
| Mitra-Rajasthan [62]                           | 9            | 13.97%               | 23.86%                              | 0.00%                               | 0.00%                               | 2.83%                                         | 0.149   | 0.081   | 0.535   | 22.22%                        | 11.11%                                    | 0.00%                  | S1, S2                                                       | 11.11%             |
| <b>MHC Class II Peptide Vaccine Evaluation</b> |              |                      |                                     |                                     |                                     |                                               |         |         |         |                               |                                           |                        |                                                              |                    |
| OptiVax-Unlinked (Ours)                        | 19           | 91.67%               | 93.23%                              | 70.19%                              | 45.87%                              | 43.95%                                        | 9.736   | 8.454   | 6.860   | 0.00%                         | 0.00%                                     | 0.00%                  | M, ORF1a/b, S2                                               | 52.63%             |
| OptiVax-Robust (Ours)                          | 19           | 90.59%               | 93.21%                              | 90.17%                              | 45.99%                              | 48.45%                                        | 10.703  | 9.405   | 7.509   | 0.00%                         | 0.00%                                     | 0.00%                  | ORF1a/b, S2, M                                               | 57.89%             |
| Ramaiah-UCIrvine [65]                          | 134          | 87.28%               | 92.69%                              | 71.65%                              | 65.68%                              | 17.86%                                        | 32.343  | 26.538  | 12.928  | 20.15%                        | 44.78%                                    | 0.00%                  | S1, M, E, N, S2                                              | 30.60%             |
| S-protein                                      | 16315        | 89.80%               | 92.13%                              | 88.84%                              | 88.62%                              | 1.49%                                         | 340.102 | 250.938 | 138.248 | 30.01%                        | 57.50%                                    | 1.43%                  | S1, S2                                                       | 16.06%             |
| OptiVax-Robust (Ours)_SMN only                 | 22           | 85.76%               | 91.79%                              | 59.64%                              | 32.08%                              | 28.16%                                        | 7.659   | 6.291   | 4.636   | 0.00%                         | 0.00%                                     | 0.00%                  | S1, S2, N, M                                                 | 36.36%             |
| S1-subunit                                     | 8905         | 86.34%               | 89.66%                              | 75.29%                              | 72.74%                              | 1.24%                                         | 171.489 | 107.331 | 52.472  | 32.39%                        | 54.28%                                    | 2.63%                  | S1                                                           | 0.71%              |
| Fast-Stanford [24]                             | 13           | 67.29%               | 74.48%                              | 10.04%                              | 2.00%                               | 15.42%                                        | 2.943   | 1.751   | 1.319   | 30.77%                        | 38.46%                                    | 0.00%                  | ORF1a, N, S2, S1, M, E                                       | 0.00%              |
| Random subset of binders                       | 19           | 72.66%               | 71.16%                              | 32.84%                              | 17.76%                              | 19.26%                                        | 4.627   | 4.022   | 2.329   | 0.00%                         | 63.16%                                    | 0.00%                  | N/A                                                          | 24.29%             |
| Banerjee-Midnapore [64]                        | 9            | 56.73%               | 67.24%                              | 8.91%                               | 0.35%                               | 19.81%                                        | 2.378   | 1.670   | 1.299   | 22.22%                        | 44.44%                                    | 0.00%                  | S2, S1                                                       | 55.56%             |
| Akhand-Sylhet [61]                             | 31           | 43.90%               | 49.82%                              | 4.85%                               | 0.21%                               | 4.40%                                         | 1.868   | 1.708   | 0.520   | 3.33%                         | 50.00%                                    | 0.00%                  | E, N, M, S1                                                  | 30.00%             |
| Poran-NEON [53]                                | 10           | 42.30%               | 47.58%                              | 0.00%                               | 0.00%                               | 6.20%                                         | 0.925   | 0.602   | 0.331   | 20.00%                        | 90.00%                                    | 0.00%                  | ORF1a/b, S2, ORF3a                                           | 20.00%             |
| Singh-Kolkata [69]                             | 7            | 41.48%               | 47.03%                              | 0.87%                               | 0.00%                               | 11.57%                                        | 1.227   | 0.853   | 0.351   | 0.00%                         | 28.57%                                    | 0.00%                  | M, N, S1, E, S2                                              | 71.43%             |
| Ahmed-HKUST [57]                               | 5            | 27.69%               | 46.01%                              | 0.00%                               | 0.00%                               | 10.18%                                        | 0.600   | 0.517   | 0.409   | 0.00%                         | 20.00%                                    | 0.00%                  | S2, N                                                        | 100.00%            |
| Qamar-Guangxi [68]                             | 11           | 39.44%               | 43.71%                              | 0.03%                               | 0.00%                               | 6.85%                                         | 1.075   | 0.911   | 0.273   | 0.00%                         | 72.73%                                    | 0.00%                  | N, ORF10, ORF7a, M, ORF8,<br>ORF6, E                         | 36.36%             |
| Mitra-Rajasthan [62]                           | 5            | 25.46%               | 39.49%                              | 0.00%                               | 0.00%                               | 10.32%                                        | 0.754   | 0.425   | 0.369   | 60.00%                        | 20.00%                                    | 0.00%                  | S2, S1                                                       | 0.00%              |
| Abdelmageed-Khartoum [56]                      | 10           | 19.15%               | 28.39%                              | 0.96%                               | 0.00%                               | 4.79%                                         | 0.919   | 0.274   | 0.244   | 60.00%                        | 70.00%                                    | 0.00%                  | E                                                            | 30.00%             |
| Vashi-Guwahati [60]                            | 20           | 20.78%               | 22.17%                              | 0.02%                               | 0.00%                               | 2.08%                                         | 0.595   | 0.376   | 0.280   | 15.79%                        | 36.84%                                    | 5.26%                  | S1, S2                                                       | 0.00%              |
| Baruah-Gauhait [55]                            | 3            | 0.00%                | 0.00%                               | 0.00%                               | 0.00%                               | 0.00%                                         | 0.000   | 0.000   | 0.000   | 66.67%                        | 100.00%                                   | 0.00%                  | S1                                                           | 0.00%              |

**Table 1.** Comparison of existing baselines, S-protein peptides, and OptiVax designed peptide vaccines (using full set of proteins or S/M/N proteins only) on various population coverage evaluation metrics and vaccine quality metrics (percentage of peptides with larger than 0.1% probability of mutating or with non-zero probability of being glycosylated). The list is sorted by EvalVax-Robust  $p(n \geq 1)$ . Random subsets are generated 200 times. The binders used for generating random subsets are predicted to bind with  $\leq 50$ nM to more than 5 of the alleles.

## 409 References

- 410 1. Patrick A Ott, Zhuting Hu, Derin B Keskin, Sachet A Shukla, Jing Sun, David J Bozym, Wandi Zhang, Adrienne Luoma,  
411 Anita Giobbie-Hurder, Lauren Peter, et al. An immunogenic personal neoantigen vaccine for patients with melanoma.  
412 *Nature*, 547(7662):217–221, 2017.
- 413 2. Weidang Li, Medha D Joshi, Smita Singhanian, Kyle H Ramsey, and Ashlesh K Murthy. Peptide vaccine: progress and  
414 challenges. *Vaccines*, 2(3):515–536, 2014.
- 415 3. Zhuting Hu, Patrick A Ott, and Catherine J Wu. Towards personalized, tumour-specific, therapeutic vaccines for cancer.  
416 *Nature Reviews Immunology*, 18(3):168, 2018.
- 417 4. Prabhu S. Arunachalam, Tysheena P. Charles, Vineet Joag, Venkata S. Bollimpelli, Madeleine K. D. Scott, Florian  
418 Wimmers, Samantha L. Burton, Celia C. Labranche, Caroline Petitdemange, Sailaja Gangadhara, Tiffany M. Styles, Clare F.  
419 Quarnstrom, Corey A. Walter, Thomas J. Ketas, Traci Legere, Pradeep Babu Jagadeesh Reddy, Sudhir Pai Kasturi, Anthony  
420 Tsai, Bertrand Z. Yeung, Shakti Gupta, Mark Tomai, John Vasilakos, George M. Shaw, Chil-Yong Kang, John P. Moore,  
421 Shankar Subramaniam, Purvesh Khatri, David Montefiori, Pamela A. Kozlowski, Cynthia A. Derdeyn, Eric Hunter, David  
422 Masopust, Rama R. Amara, and Bali Pulendran. T cell-inducing vaccine durably prevents mucosal SHIV infection even  
423 with lower neutralizing antibody titers. *Nature Medicine*, 2020.
- 424 5. Sietske Rosendahl Huber, Josine van Beek, Jørgen de Jonge, Willem Luytjes, and Debbie van Baarle. T cell responses to  
425 viral infections—opportunities for peptide vaccination. *Frontiers in immunology*, 5:171, 2014.
- 426 6. Gemma G Kenter, Marij JP Welters, A Rob PM Valentijn, Margriet JG Lowik, Dorien MA Berends-van der Meer,  
427 Annelies PG Vloon, Farah Essahsah, Lorraine M Fathers, Rienk Offringa, Jan Wouter Drijfhout, et al. Vaccination against  
428 HPV-16 oncoproteins for vulvar intraepithelial neoplasia. *New England Journal of Medicine*, 361(19):1838–1847, 2009.
- 429 7. Saranya Sridhar, Alexander Luedtke, Edith Langevin, Ming Zhu, Matthew Bonaparte, Tifany Machabert, Stephen Savarino,  
430 Betzana Zambrano, Annick Moureau, Alena Khromava, et al. Effect of dengue serostatus on dengue vaccine safety and  
431 efficacy. *New England Journal of Medicine*, 379(4):327–340, 2018.
- 432 8. Claude Roth, Tineke Cantaert, Chloé Colas, Matthieu Prot, Isabelle Casadémont, Laurine Levillayer, Jessie Thalmenssi,  
433 Pierre Langlade-Demoyen, Christiane Gerke, Kapil Bahl, et al. A modified mRNA vaccine targeting immunodominant NS  
434 epitopes protects against dengue virus infection in HLA class I transgenic mice. *Frontiers in Immunology*, 10:1424, 2019.
- 435 9. Darrell Ricke and Robert W Malone. Medical countermeasures analysis of 2019-nCoV and vaccine risks for antibody-  
436 dependent enhancement (ADE). Available at SSRN 3546070, 2020.
- 437 10. Junwei Li, Cuiling Zhang, and Hu Shan. Advances in mRNA vaccines for infectious diseases. *Frontiers in Immunology*,  
438 10:594, 2019.
- 439 11. Dimitrios Vatakis and Minnie McMillan. The signal peptide sequence impacts the immune response elicited by a DNA  
440 epitope vaccine. *Clin. Vaccine Immunol.*, 18(10):1776–1780, 2011.
- 441 12. Ugur Sahin, Katalin Karikó, and Özlem Türeci. mRNA-based therapeutics—developing a new class of drugs. *Nature*  
442 *reviews Drug discovery*, 13(10):759, 2014.
- 443 13. Ziqing Liu, Olivia Chen, J Blake Joseph Wall, Michael Zheng, Yang Zhou, Li Wang, Haley Ruth Vaseghi, Li Qian, and  
444 Jiandong Liu. Systematic comparison of 2A peptides for cloning multi-genes in a polycistronic vector. *Scientific reports*, 7  
445 (1):1–9, 2017.
- 446 14. RE Humphreys, S Adams, G Koldzic, B Nedelescu, E von Hofe, and M Xu. Increasing the potency of MHC class  
447 II-presented epitopes by linkage to Ii-Key peptide. *Vaccine*, 18(24):2693–2697, 2000.
- 448 15. Melissa J Rist, Alex Theodossis, Nathan P Croft, Michelle A Neller, Andrew Welland, Zhenjun Chen, Lucy C Sullivan,  
449 Jacqueline M Burrows, John J Miles, Rebekah M Brennan, et al. HLA peptide length preferences control CD8+ T cell  
450 responses. *The Journal of Immunology*, 191(2):561–571, 2013.
- 451 16. Roman M Chicz, Robert G Urban, William S Lane, Joan C Gorga, Lawrence J Stern, Dario AA Vignali, and Jack L  
452 Strominger. Predominant naturally processed peptides bound to HLA-DR1 are derived from MHC-related molecules and  
453 are heterogeneous in size. *Nature*, 358(6389):764–768, 1992.
- 454 17. Haoyang Zeng and David K Gifford. Quantification of uncertainty in peptide-MHC binding prediction improves high-  
455 affinity peptide selection for therapeutic design. *Cell systems*, 9(2):159–166, 2019.
- 456 18. Vanessa Jurtz, Sinu Paul, Massimo Andreatta, Paolo Marcatili, Bjoern Peters, and Morten Nielsen. NetMHCpan-4.0:  
457 improved peptide–MHC class I interaction predictions integrating eluted ligand and peptide binding affinity data. *The*  
458 *Journal of Immunology*, 199(9):3360–3368, 2017.
- 459 19. Timothy J O’Donnell, Alex Rubinsteyn, Maria Bonsack, Angelika B Riemer, Uri Laserson, and Jeff Hammerbacher.  
460 MHCflurry: open-source class I MHC binding affinity prediction. *Cell systems*, 7(1):129–132, 2018.
- 461 20. Kamilla Kjærgaard Jensen, Massimo Andreatta, Paolo Marcatili, Søren Buus, Jason A Greenbaum, Zhen Yan, Alessandro  
462 Sette, Bjoern Peters, and Morten Nielsen. Improved methods for predicting peptide binding affinity to MHC class II  
463 molecules. *Immunology*, 154(3):394–406, 2018.

- 464 **21.** Bjoern Peters, Morten Nielsen, and Alessandro Sette. T cell epitope predictions. *Annual Review of Immunology*, 38(1):  
465 123–145, 2020.
- 466 **22.** Alex Rubinsteyn, Isaac Hodes, Julia Kodysh, and Jeffrey Hammerbacher. Vaxrank: a computational tool for designing  
467 personalized cancer vaccines. *bioRxiv*, page 142919, 2017.
- 468 **23.** Leonard Moise, Andres Gutierrez, Farzana Kibria, Rebecca Martin, Ryan Tassone, Rui Liu, Frances Terry, Bill Martin,  
469 and Anne S De Groot. iVAX: An integrated toolkit for the selection and optimization of antigens and the design of  
470 epitope-driven vaccines. *Human vaccines & immunotherapeutics*, 11(9):2312–2321, 2015.
- 471 **24.** Ethan Fast, Russ B Altman, and Binbin Chen. Potential t-cell and b-cell epitopes of 2019-ncov. *bioRxiv*, 2020.
- 472 **25.** Huynh-Hoa Bui, John Sidney, Kenny Dinh, Scott Southwood, Mark J Newman, and Alessandro Sette. Predicting population  
473 coverage of T-cell epitope-based diagnostics and vaccines. *BMC bioinformatics*, 7(1):153, 2006.
- 474 **26.** Thomas Trolle, Curtis P McMurtrey, John Sidney, Wilfried Bardet, Sean C Osborn, Thomas Kaever, Alessandro Sette,  
475 William H Hildebrand, Morten Nielsen, and Bjoern Peters. The length distribution of class I-restricted T cell epitopes  
476 is determined by both peptide supply and MHC allele-specific binding preference. *The Journal of Immunology*, 196(4):  
477 1480–1487, 2016.
- 478 **27.** Yaara Finkel, Orel Mizrahi, Aharon Nachshon, Shira Weingarten-Gabbay, Yfat Yahalom-Ronen, Hadas Tamir, Hagit  
479 Achdout, Sharon Melamed, Shay Weiss, Tomer Isreali, et al. The coding capacity of SARS-CoV-2. *bioRxiv*, 2020.
- 480 **28.** Linlin Zhang, Daizong Lin, Xinyuanyuan Sun, Ute Curth, Christian Drosten, Lucie Sauerhering, Stephan Becker, Katharina  
481 Rox, and Rolf Hilgenfeld. Crystal structure of SARS-CoV-2 main protease provides a basis for design of improved  
482  $\alpha$ -ketoamide inhibitors. *Science*, 368(6489):409–412, 2020.
- 483 **29.** Stefan Elbe and Gemma Buckland-Merrett. Data, disease and diplomacy: GISAID’s innovative contribution to global  
484 health. *Global Challenges*, 1(1):33–46, 2017.
- 485 **30.** James Hadfield, Colin Megill, Sidney M Bell, John Huddleston, Barney Potter, Charlton Callender, Pavel Sagulenko,  
486 Trevor Bedford, and Richard A Neher. Nextstrain: real-time tracking of pathogen evolution. *Bioinformatics*, 34(23):  
487 4121–4123, 2018.
- 488 **31.** UniProt Consortium. UniProt: a worldwide hub of protein knowledge. *Nucleic acids research*, 47(D1):D506–D515, 2019.
- 489 **32.** Wolfgang Helmberg, Raymond Dunivin, and Michael Feolo. The sequencing-based typing tool of dbMHC: typing highly  
490 polymorphic gene sequences. *Nucleic acids research*, 32(suppl\_2):W173–W175, 2004.
- 491 **33.** hapferret. <https://github.com/nilsboar/hapferret>, 2020. GitHub commit:  
492 56188f9a96bff916cba7fdb88283c59746436a68.
- 493 **34.** Laurent Excoffier and Montgomery Slatkin. Maximum-likelihood estimation of molecular haplotype frequencies in a  
494 diploid population. *Molecular biology and evolution*, 12(5):921–927, 1995.
- 495 **35.** Timothy O’Donnell, Alex Rubinsteyn, and Uri Laserson. A model of antigen processing improves prediction of MHC  
496 I-presented peptides. *bioRxiv*, 2020.
- 497 **36.** Birkir Reynisson, Carolina Barra, Saghar Kaabinejadian, William H Hildebrand, Bjoern Peters, and Morten Nielsen.  
498 Improved prediction of MHC II antigen presentation through integration and motif deconvolution of mass spectrometry  
499 MHC eluted ligand data. *J. Proteome Res*, 17:55, 2020.
- 500 **37.** Birkir Reynisson, Bruno Alvarez, Sinu Paul, Bjoern Peters, and Morten Nielsen. NetMHCpan-4.1 and NetMHCIIpan-4.0:  
501 Improved predictions of MHC antigen presentation by concurrent motif deconvolution and integration of MS MHC eluted  
502 ligand data. *NAR Webserver*, 2020.
- 503 **38.** Marek Prachar, Sune Justesen, Daniel B Steen-Jensen, Stephan P Thorgrimsen, Erik Jurgons, Ole Winther, and Fred-  
504 erik Otzen Bagger. COVID-19 vaccine candidates: Prediction and validation of 174 SARS-CoV-2 epitopes. *bioRxiv*,  
505 2020.
- 506 **39.** Huabiao Chen, Jinlin Hou, Xiaodong Jiang, Shiwu Ma, Minjie Meng, Baomei Wang, Minghui Zhang, Mingxia Zhang,  
507 Xiaoping Tang, Fuchun Zhang, et al. Response of memory CD8+ T cells to severe acute respiratory syndrome (SARS)  
508 coronavirus in recovered SARS patients and healthy individuals. *The Journal of Immunology*, 175(1):591–598, 2005.
- 509 **40.** Minghai Zhou, Dongping Xu, Xiaojuan Li, Hongtao Li, Ming Shan, Jiaren Tang, Min Wang, Fu-Sheng Wang, Xiaodong  
510 Zhu, Hua Tao, et al. Screening and identification of severe acute respiratory syndrome-associated coronavirus-specific  
511 CTL epitopes. *The Journal of Immunology*, 177(4):2138–2145, 2006.
- 512 **41.** Yeou-Ping Tsao, Jian-Yu Lin, Jia-Tsrong Jan, Chih-Hsiang Leng, Chen-Chung Chu, Yuh-Cheng Yang, and Show-Li Chen.  
513 HLA-A\*0201 T-cell epitopes in severe acute respiratory syndrome (SARS) coronavirus nucleocapsid and spike proteins.  
514 *Biochemical and biophysical research communications*, 344(1):63–71, 2006.
- 515 **42.** Alessandro Sette, Antonella Vitiello, Barbara Reherman, Patricia Fowler, Ramin Nayersina, W Martin Kast, CJ Melief,  
516 Carla Oseroff, Lunli Yuan, Jorg Ruppert, et al. The relationship between class I binding affinity and immunogenicity of  
517 potential cytotoxic T cell epitopes. *The Journal of Immunology*, 153(12):5586–5592, 1994.
- 518 **43.** S Buus, SL Lauemøller, Peder Worning, Can Kesmir, T Frimurer, S Corbet, A Fomsgaard, J Hilden, A Holm, and Søren

- 519 Brunak. Sensitive quantitative predictions of peptide-MHC binding by a ‘Query by Committee’ artificial neural network  
520 approach. *Tissue antigens*, 62(5):378–384, 2003.
- 521 **44.** Morten Nielsen, Claus Lundegaard, Peder Worning, Sanne Lise Lauemøller, Kasper Lamberth, Søren Buus, Søren Brunak,  
522 and Ole Lund. Reliable prediction of T-cell epitopes using neural networks with novel sequence representations. *Protein*  
523 *Science*, 12(5):1007–1017, 2003.
- 524 **45.** Bruno Coutard, Coralie Valle, Xavier de Lamballerie, Bruno Canard, NG Seidah, and E Decroly. The spike glycoprotein of  
525 the new coronavirus 2019-nCoV contains a furin-like cleavage site absent in CoV of the same clade. *Antiviral research*,  
526 176:104742, 2020.
- 527 **46.** Margreet A Wolfert and Geert-Jan Boons. Adaptive immune activation: glycosylation does matter. *Nature Chemical*  
528 *Biology*, 9(12):776–784, 2013. doi: 10.1038/nchembio.1403.
- 529 **47.** R Gupta, E Jung, and S Brunak. Prediction of N-glycosylation sites in human proteins. *In preparation*, 2004. URL  
530 <http://www.cbs.dtu.dk/services/NetNGlyc/>.
- 531 **48.** Daniel Wrapp, Nianshuang Wang, Kizzmekia S Corbett, Jory A Goldsmith, Ching-Lin Hsieh, Olubukola Abiona, Barney S  
532 Graham, and Jason S McLellan. Cryo-EM structure of the 2019-nCoV spike in the prefusion conformation. *Science*, 367  
533 (6483):1260–1263, 2020.
- 534 **49.** Yong Zhang, Wanjun Zhao, Yonghong Mao, Shisheng Wang, Yi Zhong, Tao Su, Meng Gong, Xiaofeng Lu, Jingqiu  
535 Cheng, and Hao Yang. Site-specific N-glycosylation characterization of recombinant SARS-CoV-2 spike proteins using  
536 high-resolution mass spectrometry. *bioRxiv*, 2020.
- 537 **50.** Alexandra C Walls, Young-Jun Park, M Alejandra Tortorici, Abigail Wall, Andrew T McGuire, and David Veesler.  
538 Structure, function, and antigenicity of the SARS-CoV-2 spike glycoprotein. *Cell*, 2020.
- 539 **51.** A. Grifoni, D. Weiskopf, S.I. Ramirez, J. Mateus, J.M. Dan, C.R. Moderbacher, S.A. Rawlings, A. Sutherland, L. Premku-  
540 mar, R.S. Jadi, D. Marrama, A.M. de Silva, A. Frazier, A. Carlin, J.A. Greenbaum, B. Peters, F. Krammer, D.M. Smith,  
541 S. Crotty, and A. Sette. Targets of T cell responses to SARS-CoV-2 coronavirus in humans with COVID-19 disease and  
542 unexposed individuals. *Cell*, 2020. doi: 10.1016/j.cell.2020.05.015.
- 543 **52.** Chloe Hyun-Jung Lee and Hashem Koohy. In silico identification of vaccine targets for 2019-nCoV. *F1000Research*, 9,  
544 2020.
- 545 **53.** Asaf Poran, Dewi Harjanto, Matthew Malloy, Michael S Rooney, Lakshmi Srinivasan, and Richard B Gaynor. Sequence-  
546 based prediction of vaccine targets for inducing T cell responses to SARS-CoV-2 utilizing the bioinformatics predictor  
547 RECON. *bioRxiv*, 2020.
- 548 **54.** Manojit Bhattacharya, Ashish R Sharma, Prasanta Patra, Pratik Ghosh, Garima Sharma, Bidhan C Patra, Sang-Soo Lee,  
549 and Chiranjib Chakraborty. Development of epitope-based peptide vaccine against novel coronavirus 2019 (SARS-COV-2):  
550 Immunoinformatics approach. *Journal of medical virology*, 92(6):618–631, 2020.
- 551 **55.** Vargab Baruah and Sujoy Bose. Immunoinformatics-aided identification of T cell and B cell epitopes in the surface  
552 glycoprotein of 2019-nCoV. *Journal of Medical Virology*, 2020.
- 553 **56.** Miysaa I Abdelmageed, Abdelrahman Hamza Abdelmoneim, Mujahed I Mustafa, Nafisa M Elfadol, Naseem S Murshed,  
554 Shaza W Shantier, and Abdelrafie M Makhawi. Design of multi epitope-based peptide vaccine against E protein of human  
555 2019-nCoV: An immunoinformatics approach. *bioRxiv*, 2020.
- 556 **57.** Syed Faraz Ahmed, Ahmed A Quadeer, and Matthew R McKay. Preliminary identification of potential vaccine targets for  
557 the COVID-19 coronavirus (SARS-CoV-2) based on SARS-CoV immunological studies. *Viruses*, 12(3):254, 2020.
- 558 **58.** Sukrit Srivastava, Sonia Verma, Mohit Kamthania, Rupinder Kaur, Ruchi Kiran Badyal, Ajay Kumar Saxena, Ho-Joon  
559 Shin, Michael Kolbe, and Kailash Pandey. Structural basis to design multi-epitope vaccines against Novel Coronavirus 19  
560 (COVID19) infection, the ongoing pandemic emergency: an in silico approach. *bioRxiv*, 2020.
- 561 **59.** Charles V Herst, Scott Burkholz, John Sidney, Alessandro Sette, Paul E Harris, Shane Massey, Trevor Brasel, Edecio  
562 Cunha-Neto, Daniela S Rosa, William Chong Hang Chao, et al. An effective CTL peptide vaccine for ebola zaire based on  
563 survivors’ CD8+ targeting of a particular nucleocapsid protein epitope with potential implications for COVID-19 vaccine  
564 design. *Vaccine*, 2020.
- 565 **60.** Yoya Vashi, Vipin Jagrit, and Sachin Kumar. Understanding the B and T cells epitopes of spike protein of severe respiratory  
566 syndrome coronavirus-2: A computational way to predict the immunogens. *bioRxiv*, 2020.
- 567 **61.** Mst Rubaiat Nazneen Akhand, Kazi Faizul Azim, Syeda Farjana Hoque, Mahmuda Akther Moli, Bijit Das Joy, Hafsa  
568 Akter, Ibrahim Khalil Afif, Nadim Ahmed, and Mahmudul Hasan. Genome based evolutionary study of SARS-CoV-2  
569 towards the prediction of epitope based chimeric vaccine. *bioRxiv*, 2020.
- 570 **62.** Debarghya Mitra, Nishant Shekhar, Janmejay Pandey, Alok Jain, and Shiv Swaroop. Multi-epitope based peptide vaccine  
571 design against SARS-CoV-2 using its spike protein. *bioRxiv*, 2020.
- 572 **63.** Arbaaz Khan, Aftab Alam, Nikhat Imam, Mohd Faizan Siddiqui, and Romana Ishrat. Design of an epitope-based peptide  
573 vaccine against the Severe Acute Respiratory Syndrome Coronavirus-2 (SARS-CoV-2): A vaccine informatics approach.



574 *bioRxiv*, 2020.

- 575 **64.** Amrita Banerjee, Dipannita Santra, and Smarajit Maiti. Energetics based epitope screening in SARS CoV-2 (COVID 19)  
576 spike glycoprotein by immuno-informatic analysis aiming to a suitable vaccine development. *bioRxiv*, 2020.
- 577 **65.** Arunachalam Ramaiah and Vaithilingaraja Arumugaswami. Insights into cross-species evolution of novel human coron-  
578 avirus 2019-nCoV and defining immune determinants for vaccine development. *bioRxiv*, 2020.
- 579 **66.** Ekta Gupta, Rupesh Kumar Mishra, and Ravi Ranjan Kumar Niraj. Identification of potential vaccine candidates against  
580 SARS-CoV-2, a step forward to fight novel coronavirus 2019-nCoV: A reverse vaccinology approach. *bioRxiv*, 2020.
- 581 **67.** Ratnadeep Saha and Burra VLS Prasad. In silico approach for designing of a multi-epitope based vaccine against novel  
582 Coronavirus (SARS-COV-2). *bioRxiv*, 2020.
- 583 **68.** Muhammad Tahir ul Qamar, Abdur Rehman, Usman Ali Ashfaq, Muhammad Qasim Awan, Israr Fatima, Farah Shahid,  
584 and Ling-Ling Chen. Designing of a next generation multiepitope based vaccine (MEV) against SARS-COV-2: Immunoin-  
585 formatics and in silico approaches. *bioRxiv*, 2020.
- 586 **69.** Abhishek Singh, Mukesh Thakur, Lalit Kumar Sharma, and Kailash Chandra. Designing a multi-epitope peptide-based  
587 vaccine against SARS-CoV-2. *bioRxiv*, 2020.
- 588 **70.** World Health Organization. *DRAFT landscape of COVID-19 candidate vaccines*, 2020 (accessed  
589 May 16, 2020). [https://www.who.int/blueprint/priority-diseases/key-action/  
590 novel-coronavirus-landscape-ncov.pdf](https://www.who.int/blueprint/priority-diseases/key-action/novel-coronavirus-landscape-ncov.pdf).
- 591 **71.** F. Pedregosa, G. Varoquaux, A. Gramfort, V. Michel, B. Thirion, O. Grisel, M. Blondel, P. Prettenhofer, R. Weiss,  
592 V. Dubourg, J. Vanderplas, A. Passos, D. Cournapeau, M. Brucher, M. Perrot, and E. Duchesnay. Scikit-learn: Machine  
593 learning in Python. *Journal of Machine Learning Research*, 12:2825–2830, 2011.

594  
595  
596

## Supplementary Information for: Robust computational design and evaluation of peptide vaccines for cellular immunity with application to SARS-CoV-2

597

### S1 Validation of Computational Peptide-MHC Prediction Models

598

#### S1.1 Criteria for Predicted Binding

599 NetMHCpan-4.0 [18] and NetMHCIIpan-4.0 [36] output predicted binding affinity (BA), percentile rank of predicted BA  
600 compared to a set of random natural peptides, and percentile rank of an eluted ligand (EL) score compared to a set of random  
601 natural peptides. Default parameters for these methods suggest EL percentile rank thresholds of 0.5% and 2% rank for  
602 classifying peptides as strong and weak binders, respectively, for MHC class I and thresholds of 2% and 10% for strong and  
603 weak binders, respectively, for MHC class II.

604 To identify binders for our vaccine designs, we use a 50nM predicted binding affinity threshold (Section 2.2). We find  
605 binders selected with this criterion are also considered binders under alternative criteria based on percentile rank. Across our  
606 set of all candidate SARS-CoV-2 MHC class I peptides (Section 2.1), we find that 91.0% of peptide-MHC hits with  $\leq 50$ nM  
607 predicted binding affinity by NetMHCpan-4.0 are also considered binders using BA percentile rank  $\leq 0.5\%$  (100.0% have  
608 BA percentile rank  $\leq 2\%$ ). Using percentile rank for EL scores, 67.6% of peptide-MHC hits with  $\leq 50$ nM predicted binding  
609 affinity have EL percentile rank  $\leq 0.5\%$  (92.6% have EL percentile rank  $\leq 2\%$ ). Across all candidate SARS-CoV-2 MHC class  
610 II peptides, we find that 86.1% of peptide-MHC hits with  $\leq 50$ nM predicted binding affinity by NetMHCIIpan-4.0 are also  
611 considered binders using BA percentile rank  $\leq 2\%$  (100.0% have BA percentile rank  $\leq 10\%$ ). Using percentile rank for EL  
612 scores, 26.1% of peptide-MHC hits with  $\leq 50$ nM predicted binding affinity have EL percentile rank  $\leq 2\%$  (63.1% have EL  
613 percentile rank  $\leq 10\%$ ).

614

#### S1.2 Validation on SARS-CoV-2 and SARS-CoV Experimental Data

615 We evaluate peptide-MHC binding predictions on a set of experimentally assessed SARS-CoV-2 peptides whose peptide-MHC  
616 complex stability was assessed in vitro across 11 MHC allotypes (5 HLA-A, 1 HLA-B, 4 HLA-C, 1 HLA-DRB1) [38]. Prachar  
617 et al. [38] suggest that peptides with low ( $< 60\%$ ) stability are unlikely to elicit an immune response and are unsuitable for  
618 vaccine development. For MHC class I alleles, the dataset contains 912 unique peptides-MHC pairs, of which 185 peptides  
619 are considered stable ( $\geq 60\%$  stability). For MHC class II, the dataset contains 93 total peptides, of which 22 are stable. We  
620 use our computational models to predict peptide-MHC binding and evaluate them using various binding criteria against the  
621 experimental peptide stability measurement (Table S1). AUROC and average precision are computed using raw predictions, and  
622 the remaining metrics are computed using binarized predictions based on the respective binding criteria (using scikit-learn [71]).  
623 We compare classification performance using different binding criteria (see Section S1.1) and find in general that classifying  
624 binders using predicted binding affinity using a 50nM threshold maximizes AUROC and precision (Table S1). We find that our  
625 mean ensemble of NetMHCpan-4.0 and MHCflurry further improves classification AUROC and precision over the individual  
626 models for predicting MHC class I epitopes. On MHC class II data, we note NetMHCIIpan-4.0 achieves AUROC 0.848 and  
627 precision 0.625 using a 500nM threshold (Table S1). While NetMHCIIpan-4.0 with a 50nM threshold does not identify any  
628 peptides in this dataset as binders, we use this stricter threshold in our vaccine designs as it is more conservative and less likely  
629 to admit false positive binders. In general, we find performance of PUFFIN with a 50nM binding threshold comparable to  
630 alternative methods on both MHC class I and class II data and use PUFFIN as part of our vaccine design evaluation.

631 We additionally validate our computational models using previously reported SARS-CoV T cell epitopes from experimental  
632 studies [39, 40, 41] as provided by Fast et al. [24]. For MHC class I, this dataset contains 17 experimentally-determined  
633 HLA-A\*02:01 associated CD8 T cell epitopes and 1236 non-epitope 9-mer peptides from the rest of the SARS-CoV Spike (S)  
634 protein. Table S2 shows the performance of our peptide-MHC binding prediction models on these SARS-CoV peptides.

| MHC      | Model               | Binding Criterion    | AUROC | Precision | Sensitivity | Specificity | Avg. Precision |
|----------|---------------------|----------------------|-------|-----------|-------------|-------------|----------------|
| Class I  | NetMHCpan-4.0       | BA $\leq$ 50nM       | 0.845 | 0.516     | 0.714       | 0.829       | 0.486          |
|          | NetMHCpan-4.0       | BA $\leq$ 500nM      | 0.845 | 0.308     | 0.968       | 0.446       | 0.486          |
|          | NetMHCpan-4.0       | BA % Rank $\leq$ 0.5 | 0.746 | 0.249     | 0.968       | 0.257       | 0.416          |
|          | NetMHCpan-4.0       | BA % Rank $\leq$ 2   | 0.746 | 0.212     | 1.000       | 0.054       | 0.416          |
|          | NetMHCpan-4.0       | EL % Rank $\leq$ 0.5 | 0.757 | 0.256     | 0.930       | 0.312       | 0.479          |
|          | NetMHCpan-4.0       | EL % Rank $\leq$ 2   | 0.757 | 0.214     | 0.989       | 0.077       | 0.479          |
|          | NetMHCpan-4.1       | BA $\leq$ 50nM       | 0.853 | 0.504     | 0.719       | 0.820       | 0.499          |
|          | NetMHCpan-4.1       | BA $\leq$ 500nM      | 0.853 | 0.304     | 0.984       | 0.428       | 0.499          |
|          | NetMHCpan-4.1       | EL % Rank $\leq$ 0.5 | 0.776 | 0.278     | 0.903       | 0.403       | 0.490          |
|          | NetMHCpan-4.1       | EL % Rank $\leq$ 2   | 0.776 | 0.219     | 0.989       | 0.103       | 0.490          |
|          | MHCflurry 1.6.0     | BA $\leq$ 50nM       | 0.724 | 0.404     | 0.422       | 0.842       | 0.411          |
|          | PUFFIN              | BA $\leq$ 50nM       | 0.768 | 0.526     | 0.492       | 0.887       | 0.485          |
|          | PUFFIN              | BA $\leq$ 500nM      | 0.768 | 0.272     | 0.870       | 0.406       | 0.485          |
| Ensemble | Mean BA $\leq$ 50nM | 0.862                | 0.683 | 0.514     | 0.939       | 0.650       |                |
| Class II | NetMHCIIpan-4.0     | BA $\leq$ 50nM       | 0.848 | 0.000     | 0.000       | 1.000       | 0.762          |
|          | NetMHCIIpan-4.0     | BA $\leq$ 500nM      | 0.848 | 0.625     | 0.682       | 0.873       | 0.762          |
|          | NetMHCIIpan-4.0     | EL % Rank $\leq$ 2   | 0.908 | 1.000     | 0.182       | 1.000       | 0.785          |
|          | NetMHCIIpan-4.0     | EL % Rank $\leq$ 10  | 0.908 | 0.789     | 0.682       | 0.944       | 0.785          |
|          | NetMHCIIpan-3.2     | BA $\leq$ 50nM       | 0.766 | 1.000     | 0.045       | 1.000       | 0.544          |
|          | NetMHCIIpan-3.2     | BA $\leq$ 500nM      | 0.766 | 0.253     | 0.909       | 0.169       | 0.544          |
|          | NetMHCIIpan-3.2     | BA % Rank $\leq$ 2   | 0.766 | 0.380     | 0.864       | 0.563       | 0.536          |
|          | NetMHCIIpan-3.2     | BA % Rank $\leq$ 10  | 0.766 | 0.253     | 1.000       | 0.085       | 0.536          |
|          | PUFFIN              | BA $\leq$ 50nM       | 0.704 | 0.667     | 0.091       | 0.986       | 0.430          |
|          | PUFFIN              | BA $\leq$ 500nM      | 0.704 | 0.275     | 0.864       | 0.296       | 0.430          |

**Table S1.** Classification performance of computational methods for predicting peptide-MHC binding evaluated on experimental SARS-CoV-2 peptide stability data across 11 MHC allotypes (5 HLA-A, 1 HLA-B, 4 HLA-C, 1 HLA-DRB1). Ensemble outputs the mean predicted binding affinity of NetMHCpan-4.0 and MHCflurry (see Section 2.2). (BA = binding affinity, EL = eluted ligand)

| Model           | Binding Criterion    | AUROC | Precision | Sensitivity | Specificity | Avg. Precision |
|-----------------|----------------------|-------|-----------|-------------|-------------|----------------|
| NetMHCpan-4.0   | BA $\leq$ 50nM       | 0.977 | 0.474     | 0.529       | 0.992       | 0.470          |
| NetMHCpan-4.0   | BA $\leq$ 500nM      | 0.977 | 0.250     | 0.706       | 0.971       | 0.470          |
| NetMHCpan-4.0   | BA % Rank $\leq$ 0.5 | 0.977 | 0.538     | 0.412       | 0.995       | 0.470          |
| NetMHCpan-4.0   | BA % Rank $\leq$ 2   | 0.977 | 0.324     | 0.647       | 0.981       | 0.470          |
| NetMHCpan-4.0   | EL % Rank $\leq$ 0.5 | 0.985 | 0.500     | 0.706       | 0.990       | 0.536          |
| NetMHCpan-4.0   | EL % Rank $\leq$ 2   | 0.985 | 0.269     | 0.824       | 0.969       | 0.536          |
| MHCflurry 1.6.0 | BA $\leq$ 50nM       | 0.987 | 0.360     | 0.529       | 0.987       | 0.406          |
| NetMHCpan-4.1   | BA $\leq$ 50nM       | 0.979 | 0.438     | 0.412       | 0.993       | 0.466          |
| NetMHCpan-4.1   | BA $\leq$ 500nM      | 0.979 | 0.267     | 0.706       | 0.973       | 0.466          |
| NetMHCpan-4.1   | EL % Rank $\leq$ 0.5 | 0.990 | 0.480     | 0.706       | 0.989       | 0.521          |
| NetMHCpan-4.1   | EL % Rank $\leq$ 2   | 0.990 | 0.298     | 1.000       | 0.968       | 0.521          |
| PUFFIN          | BA $\leq$ 50nM       | 0.976 | 0.467     | 0.412       | 0.994       | 0.425          |
| PUFFIN          | BA $\leq$ 500nM      | 0.976 | 0.231     | 0.706       | 0.968       | 0.425          |
| Ensemble        | Mean BA $\leq$ 50nM  | 0.980 | 0.474     | 0.529       | 0.992       | 0.427          |

**Table S2.** Classification performance of computational methods for predicting peptide-MHC binding evaluated on 17 experimentally determined HLA-A\*02:01 associated CD8 T-cell epitopes from SARS-CoV vs. rest of SARS-CoV Spike (S) protein. Ensemble outputs the mean predicted binding affinity of NetMHCpan-4.0 and MHCflurry (see Section 2.2). (BA = binding affinity, EL = eluted ligand)

## 635 S2 Details on S, M, N protein only vaccine design

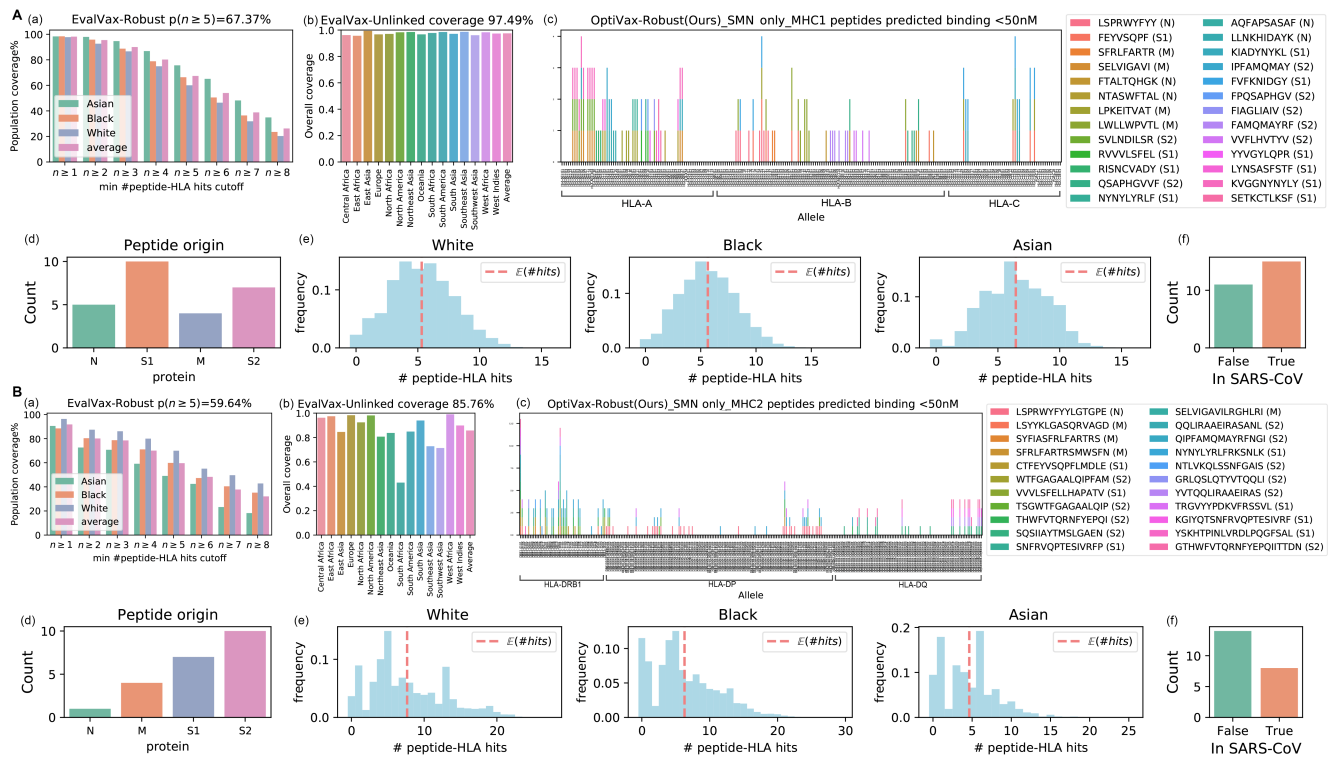

**Figure S1.** OptiVax-Robust designed vaccine using peptides from S, M, and N proteins only. (A) Results for MHC class I. (B) Results for MHC class II. (a) EvalVax-Robust population coverage at different minimum number of peptide-HLA hit cutoffs. (b) EvalVax-Unlinked population coverage. (c) Binding of vaccine peptides to each of the available alleles in MHC I and II. (d) Distribution of peptide origin. (e) Distribution of the number of per-individual peptide-HLA hits in White/Black/Asian populations. (f) Peptide presence in SARS-CoV.



636 **S3 Evaluation of baseline and OptiVax vaccines using different prediction tools/binder**  
637 **calling strategies**

638 See supplementary table in `Supplementary_S3_evaluation_on_different_tools.xlsx`.

639 **S4 Detailed GISAID accessions**

640 See table in `GISAID_Acknowledgements.xlsx` for acknowledgements.
